# Supplementary material
Source: publisher figshare collection journal article supplement (https://frontiersin.figshare.com/ndownloader/files/24552815)
Supplement: Supplementary file 1 [file 24552815]

## Sheet: 1st
ID	Depth	age		Cren 1292	Cren' 1292‘	GDGT-0 1302	GDGT-1 1300	GDGT-2 1298	GDGT-3 1296	Ia 1022	Ib 1020	Ic 1018	Iia 1036	Iib 1034	Iic 1032	IIIa 1050	IIIb 1048	IIIc 1046		f(Cren)	f(Cren')	f(GDGT-0)	f(GDGT-1)	f(GDGT-2)	f(GDGT-3)	f(Ia)	f(Ib)	f(Ic)	f(Iia)	f(Iib)	f(Iic)	f(IIIa)	f(IIIb)	f(IIIc)		GDGT-0/Cren	MI	Cren'%	TEX86	LST-Powers 2010	error	Tetra%	Penta%	Hexa%	BIT	CBT	MBT	MBT'	MBTm
LGC-5''	5	-16.2		246606	1034.41	146961	13412.6	6491.71	1094.14	3950.98	2051.97	3729.7	7735.52	9819.68	3451.75	9365.56	2184.95	0		0.53857	0.00225908	0.320953	0.0292922	0.0141774	0.00238953	0.00862867	0.00448136	0.00814541	0.0168938	0.0214455	0.00753838	0.0204537	0.00477178	0		0.595934	0.0781661	0.00248896	0.391246	7.65389	3.6	0.23014	0.496734	0.273126	0.0786528	-0.00682662	0.268212	0.242678	0.273126
LGC-10	10	38.9		236312	0	136557	11041.8	6305.71	2017.14	4794.36	2436.72	3810.89	8186.03	9247.72	3850.52	9825.45	1756.29	0		0.541824	0	0.313103	0.025317	0.0144579	0.00462496	0.0109927	0.00558699	0.00873773	0.0187692	0.0212035	0.0088286	0.0225281	0.00402688	0		0.577868	0.0757388	0	0.429796	9.78307	3.6	0.25148	0.484747	0.263773	0.0880134	0.0456798	0.301061	0.261958	0.263773
LGC-15	15	94.8		253751	0	149819	13013.8	7752.44	2241.7	5048.42	2792.58	8661.73	9505.33	11628	4463.62	10310.9	2061.9	0		0.527493	0	0.311442	0.0270529	0.0161156	0.00466001	0.0104946	0.00580517	0.0180059	0.0197595	0.0241721	0.0092789	0.0214341	0.00428624	0		0.590418	0.0831335	0	0.434378	10.0361	3.6	0.302955	0.469906	0.227139	0.0892436	0.00399218	0.353897	0.314874	0.227139
LGC-20	20	209.3		281601	0	161852	14064.4	8258.29	2056.35	5642.69	2799.49	6539.58	9299.03	11344.8	3781.4	12355.2	1922.34	0		0.539966	0	0.310349	0.0269682	0.0158351	0.00394301	0.0108198	0.00536797	0.0125395	0.0178307	0.0217535	0.00725077	0.0236909	0.00368605	0		0.574757	0.0796752	0	0.423095	9.41294	3.6	0.27907	0.454977	0.265953	0.0883686	0.0238194	0.331145	0.289434	0.265953
LGC-25	25	332.2		257233	0	140756	11945.9	5886.9	1731.4	4655.1	2385.64	9016.9	8275.8	9828.7	3707.3	10351.5	2064.9	0		0.549832	0	0.300865	0.0255342	0.0125832	0.00370084	0.00995021	0.00509927	0.0192735	0.0176894	0.0210087	0.0079243	0.0221262	0.00441369	0		0.547194	0.0706806	0	0.3894	7.55195	3.6	0.319327	0.433756	0.246916	0.0829987	0.0247587	0.371317	0.333001	0.246916
LGC-27	27	380.8		230243	0	131832	10723.9	6143.73	1686	5055.87	2673.95	4100	8495.85	10001.7	4019.85	9940.87	1891	0		0.539453	0	0.308879	0.0251258	0.0143946	0.00395025	0.0118458	0.006265	0.00960619	0.0199056	0.0234337	0.00941841	0.0232912	0.00443056	0		0.572579	0.0745735	0	0.422005	9.35277	3.6	0.256173	0.48761	0.256217	0.0925869	0.0290242	0.307673	0.267111	0.256217
LGC-35	35	566.8		232421	0	128720	11008.1	6477.83	1894.8	6584.86	2720.16	4734.72	11347.2	9745.25	3411.71	12833	1994.64	0		0.535664	0	0.296663	0.0253705	0.0149295	0.00436697	0.0151762	0.00626919	0.0109122	0.0261521	0.02246	0.00786302	0.0295764	0.00459708	0		0.553823	0.0769682	0	0.432008	9.90523	3.6	0.263057	0.459124	0.277819	0.116895	0.157924	0.318603	0.27327	0.277819
LGC-40	40	678.4		240278	0	130900	11401.7	7272.15	2040.75	7101.2	2250	35508.2	12214.3	10491	3494.5	10437.2	2129.38	1094.52		0.504137	0	0.274646	0.0239224	0.015258	0.00428178	0.0148993	0.00472082	0.0745012	0.0256273	0.0220116	0.00733195	0.0218987	0.00446774	0.00229646		0.544784	0.0793685	0	0.449581	10.8758	3.6	0.5295	0.309251	0.161249	0.110183	0.180702	0.595196	0.550446	0.161249
LGC-45	45	787.9		277793	1461.79	174957	15101.2	8065.43	2207.4	8284.7	3075.63	4942.74	16075.3	12588	4142.16	17706.8	2725.36	0		0.505882	0.00266203	0.31861	0.0275004	0.0146877	0.00401984	0.0150871	0.00560095	0.0090011	0.0292743	0.0229237	0.00754318	0.0322454	0.00496308	0		0.62981	0.0832949	0.00304803	0.437275	10.1961	3.6	0.234439	0.471745	0.293816	0.131516	0.191785	0.280216	0.244002	0.293816
LGC-49	49	876.2		268805	0	167595	14375.7	7670.23	1814.68	6594.62	2675.45	5153.66	11912.8	10439.3	3804.17	12951.3	3069.14	0		0.520072	0	0.324255	0.0278135	0.01484	0.00351096	0.012759	0.00517634	0.00997107	0.0230484	0.0201975	0.00736014	0.0250576	0.00593804	0		0.623482	0.0815286	0	0.397513	8.00006	3.6	0.254834	0.462121	0.283044	0.10477	0.149586	0.304746	0.269445	0.283044
LGC-55	55	1007		246719	0	148252	11826.1	6712.2	1808.5	5711.47	2892.4	19792.4	9162.7	9703.5	3479	10133.6	2252.6	0		0.515668	0	0.309862	0.0247177	0.0140292	0.00377995	0.0119375	0.00604541	0.0413681	0.019151	0.0202813	0.00727146	0.0211802	0.00470816	0		0.600895	0.0761865	0	0.418773	9.17428	3.6	0.449823	0.353968	0.196209	0.0920328	0.0722035	0.520805	0.466468	0.196209
LGC-59	59	1094.8		308704	0	190324	15134.5	8774.58	2107.2	6156.91	2761.46	12472.9	10422.3	10902.6	4084.37	12329.1	2905.68	0		0.52583	0	0.324187	0.0257793	0.0149462	0.00358929	0.0104874	0.00470373	0.0212457	0.0177528	0.0185709	0.0069571	0.0210007	0.00494938	0		0.616525	0.0777254	0	0.418268	9.14637	3.6	0.344824	0.409594	0.245582	0.0856258	0.0839841	0.40272	0.361769	0.245582
LGC-64	64	1206.3		330880	0	209991	17078.7	10431.9	2724.82	6734	2817.36	4540.4	12625.3	12765.4	4826	14153.2	4177.36	0		0.522102	0	0.331349	0.0269488	0.0164607	0.00429955	0.0106257	0.00444557	0.00716439	0.0199217	0.0201428	0.00761504	0.0223326	0.00659154	0		0.634644	0.0837279	0	0.435143	10.0784	3.6	0.224968	0.482394	0.292638	0.0919681	0.0942453	0.265443	0.241043	0.292638
LGC-70	70	1330.9		331250	0	204963	16910.3	9070.34	2738.9	7531.58	3199.83	13272.6	11890.2	14142.2	5626.75	14615.6	3597.83	0		0.518543	0	0.320852	0.0264716	0.0141988	0.00428751	0.01179	0.00500905	0.0207771	0.0186131	0.0221384	0.00880818	0.0228794	0.00563209	0		0.618757	0.0797833	0	0.411192	8.75554	3.6	0.32492	0.428541	0.246539	0.0931797	0.0491891	0.38014	0.341554	0.246539
LGC-75	75	1429.7		348387	0	216196	18286	9616.7	2294.23	6881.17	3153.22	13206	11284.2	13418.3	5099	14902.2	3978	0		0.522553	0	0.324276	0.0274276	0.0144243	0.00344116	0.0103212	0.00472958	0.019808	0.0169254	0.0201264	0.0076481	0.0223521	0.00596669	0		0.620562	0.0797628	0	0.394442	7.83041	3.6	0.323133	0.414358	0.262509	0.0866881	0.0398819	0.375525	0.342052	0.262509
LGC-80	80	1530.6		320994	0	186645	15112.6	8982.25	2258.65	7517.68	4437.42	11692.7	11376.1	16148	7273.39	12647.8	3152.83	0		0.527744	0	0.306861	0.0248465	0.0147677	0.00371343	0.0123598	0.00729553	0.0192239	0.0187034	0.0265488	0.0119581	0.0207942	0.00518355	0		0.581458	0.0758707	0	0.426543	9.60339	3.6	0.318506	0.468679	0.212815	0.0894706	-0.0372409	0.379635	0.332631	0.212815
LGC-85	85	1634.4		244326	0	144096	12135.9	6584.28	1638.17	5726.12	2107.61	3602.8	9091.17	9894.29	3554.65	10718.4	3139.34	0		0.535081	0	0.315574	0.026578	0.0144198	0.00358764	0.0125404	0.00461573	0.00789024	0.0199099	0.0216688	0.00778479	0.0234736	0.00687525	0		0.589769	0.0769156	0	0.403886	8.35202	3.6	0.239086	0.471212	0.289703	0.0946251	0.0915188	0.285909	0.255879	0.289703
LGC-90	90	1734.7		277779	0	170592	15331.6	8666.3	2309.4	6852	2635.92	8859.22	11386.2	12291.7	4998	14176	4457	0		0.514087	0	0.315715	0.0283743	0.0160388	0.00427402	0.012681	0.00487831	0.0163958	0.0210725	0.0227483	0.00924983	0.0262356	0.0082486	0		0.614128	0.0865126	0	0.417211	9.08799	3.6	0.279443	0.43676	0.283797	0.104497	0.0869914	0.326647	0.299795	0.283797
LGC-97	97	1874.5		216625	0	133438	12314.3	6953.21	1615.69	7126	2349.3	30479.2	10136.2	8843.49	3053.25	13437.8	2406	0		0.4827	0	0.297337	0.0274396	0.0154937	0.0036002	0.0158787	0.00523489	0.067916	0.0225862	0.0197057	0.00680348	0.0299431	0.00536123	0		0.615987	0.0879262	0	0.410325	8.70766	3.6	0.513348	0.283086	0.203566	0.124128	0.188158	0.584507	0.529723	0.203566
LGC-101	101	1951.8		201400	0	128056	11845.8	7116	1605.23	6373.3	1768.33	27973.4	9158	7782	2800	11441.4	2302.3	0		0.479957	0	0.305169	0.0282297	0.0169581	0.00382543	0.0151882	0.00421411	0.0666634	0.0218244	0.0185453	0.00667268	0.027266	0.00548661	0		0.635827	0.092658	0	0.424039	9.46512	3.6	0.518904	0.283626	0.197471	0.118108	0.211189	0.587646	0.536656	0.197471
LGC-107	107	2073		259016	0	166449	15205.8	8562.86	1928.26	8398.42	2802.68	103722	11434.5	10459.5	4462.47	16434	2833.47	0		0.42343	0	0.272105	0.0248579	0.0139982	0.00315225	0.0137294	0.00458172	0.169562	0.0186927	0.0170988	0.00729508	0.0268657	0.00463205	0		0.64262	0.0902555	0	0.408264	8.59381	3.6	0.715823	0.164166	0.120011	0.122821	0.174772	0.76951	0.728683	0.120011
LGC-112	112	2171.8		255801	0	163471	14891.8	7859.78	1913.33	7887.53	2696.72	17392.2	11357	10163.7	3898.51	13854.6	2959.2	0		0.497525	0	0.317947	0.0289641	0.015287	0.00372137	0.015341	0.00524504	0.0338273	0.022089	0.0197681	0.00758249	0.0269468	0.00575556	0		0.639057	0.0879426	0	0.396235	7.92948	3.6	0.398471	0.362048	0.239481	0.114569	0.175052	0.469205	0.416005	0.239481
LGC-117	117	2264.6		243403	0	164674	13762.8	7586.58	2114.24	7375.1	2659.98	6999.12	10207.5	9484.15	3731.32	14298.9	2426.02	0		0.498039	0	0.336948	0.0281607	0.0155233	0.00432605	0.0150906	0.00544272	0.0143212	0.0208861	0.019406	0.00763484	0.0292577	0.004964	0		0.67655	0.0879226	0	0.413441	8.87975	3.6	0.297894	0.409621	0.292485	0.115813	0.160717	0.3613	0.311092	0.292485
LGC-122	122	2349.2		316229	0	213585	19332.9	9779.58	2356.73	8972.82	3925.28	27326	14195.9	14838.3	6624.4	17890.9	3902.33	0		0.479892	0	0.324125	0.0293385	0.0148409	0.00357644	0.0136167	0.00595679	0.0414684	0.0215429	0.0225178	0.0100528	0.0271502	0.00592196	0		0.675413	0.0905073	0	0.385657	7.3452	3.6	0.411812	0.36507	0.223118	0.11492	0.0915863	0.474465	0.428949	0.223118
LGC-127	127	2434.4		265992	0	175781	15924.5	8348.04	1903.32	7674.85	3435.32	2958	12331.2	10726.2	4487.3	15210.9	3040.66	0		0.503951	0	0.333036	0.0301707	0.0158163	0.00360605	0.0145409	0.00650859	0.00560426	0.0233628	0.020322	0.00850169	0.0288187	0.00576087	0		0.660849	0.0895919	0	0.391634	7.67534	3.6	0.235	0.460118	0.304882	0.116919	0.150051	0.288553	0.247575	0.304882
LGC-132	132	2520.4		243637	0	159469	13668.8	7880	2069.26	6547.16	2895.62	3471.4	8769.74	11641	4761	12442.6	2245.25	0		0.508108	0	0.332576	0.0285065	0.0164338	0.00431547	0.0136542	0.00603885	0.00723965	0.0182894	0.0242775	0.00992913	0.0259492	0.0046825	0		0.654537	0.0883727	0	0.421256	9.31141	3.6	0.244708	0.476974	0.278317	0.102284	0.0227074	0.298036	0.255582	0.278317
LGC-137	137	2605.3		209340	0	133330	10805.3	5943	1620.41	5309.2	3268.84	5166.15	8779.34	13622.7	5428.17	11887.1	2387.56	0		0.50215	0	0.319822	0.025919	0.0142556	0.00388692	0.0127353	0.00784106	0.0123922	0.0210592	0.0326771	0.0130207	0.0285139	0.0057271	0		0.636906	0.0806676	0	0.411755	8.78665	3.6	0.246095	0.498311	0.255594	0.110386	-0.0788033	0.290753	0.257086	0.255594
LGC 2-4	147	2770.2		139419	0	79886.4	6735.1	3562.6	1097.26	7057.97	3402.56	43583.6	11479.9	13174.4	5083.46	14777.5	2561.65	0		0.420163	0	0.240751	0.0202974	0.0107365	0.00330678	0.0212704	0.0102542	0.131347	0.0345966	0.0397033	0.0153199	0.0445345	0.00771997	0		0.572995	0.0755564	0	0.40894	8.63119	3.6	0.53445	0.294081	0.171469	0.192871	0.0485549	0.596115	0.548341	0.171469
LGC 2-9	152	2851.7		116939	0	66201.3	5329.47	2766.6	1082.98	5733	2340	98455.8	10030	10611.4	3582.8	11951.4	1896	2502.75		0.344523	0	0.195041	0.0157016	0.0081509	0.00319065	0.0168905	0.00689406	0.290069	0.0295502	0.0312631	0.0105556	0.035211	0.00558596	0.00737355		0.566118	0.0727814	0	0.419388	9.2082	3.6	0.724178	0.164675	0.111148	0.191592	0.0853222	0.766228	0.7465	0.111148
LGC 2-14	157	2937.3		159118	0	91456.5	7644.4	3616.52	1492.7	8101.25	3579.77	7790.98	13553.9	14229.4	4975.85	17974.4	2837.47	0		0.473043	0	0.271892	0.0227261	0.0107516	0.00443766	0.0240843	0.0106423	0.0231619	0.0402945	0.0423027	0.0147927	0.0534362	0.00843553	0		0.574772	0.0742043	0	0.400609	8.17106	3.6	0.266583	0.448491	0.284926	0.199396	0.0849175	0.31733	0.277357	0.284926
LGC 2-19	162	3018.7		148589	0	84933.3	7217.8	3861.6	1439.49	6176.84	3618.64	15382.2	10683.5	14306.3	5872.3	14168.9	1900.89	0		0.46704	0	0.266959	0.0226867	0.0121376	0.00452455	0.0194148	0.011374	0.0483488	0.03358	0.044967	0.0184576	0.0445352	0.00597481	0		0.571599	0.077705	0	0.423447	9.43242	3.6	0.349159	0.427989	0.222852	0.172751	-0.0265914	0.404045	0.358612	0.222852
LGC 2-24	167	3096.8		126635	0	72640.5	6046	3271	1190.54	5519	2545	26793.2	9406.98	11060.6	3936	12839.7	2530.69	0		0.445248	0	0.255404	0.0212577	0.0115008	0.00418594	0.0194048	0.00894822	0.0942049	0.0330749	0.0388891	0.013839	0.0451444	0.0088979	0		0.573621	0.0766177	0	0.424604	9.49629	3.6	0.46706	0.326989	0.205951	0.179829	0.0402252	0.52364	0.483453	0.205951
LGC-2-29	172	3165.7		123289	0	73772.3	5581.8	3433.7	1290.7	5286.6	5630.6	45590.7	10868.5	9788.6	3708.1	13024.6	2161.4	0		0.406322	0	0.243131	0.0183959	0.0113164	0.00425375	0.017423	0.0185567	0.150253	0.0358192	0.0322602	0.0122208	0.0429251	0.00712331	0		0.598369	0.077145	0	0.458404	11.3631	3.6	0.588262	0.253648	0.15809	0.191382	0.0202478	0.663691	0.601803	0.15809
LGC-2-34	177	3237.9		126976	0	77944.4	6892.7	3925.9	1392.4	6177.6	2759.7	11911.6	11249.9	13147	4541.2	14759.9	2299.3	0		0.447134	0	0.274474	0.024272	0.0138247	0.0049032	0.0217538	0.00971801	0.0419455	0.0396154	0.0462959	0.0159914	0.0519755	0.00809676	0		0.61385	0.0877308	0	0.435534	10.1	3.6	0.311894	0.432906	0.255201	0.202228	0.039655	0.360029	0.323004	0.255201
LGC-2-39	182	3309.5		102538	0	62166.8	5414	3033.9	1040.2	4730.4	2510.2	13283.8	8770.7	9371.2	3067.1	11024.5	1641.5	0		0.448562	0	0.271956	0.0236841	0.0132721	0.00455047	0.0206937	0.0109811	0.0581114	0.0383684	0.0409953	0.0134174	0.0482279	0.00718092	0		0.606284	0.0846958	0	0.42939	9.76067	3.6	0.377291	0.389876	0.232833	0.193019	0.0555015	0.435219	0.38903	0.232833
LGC-2-44	187	3381.3		127818	0	75662.7	5342.6	3681.7	1055.7	6564.8	2810.2	107321	10512.1	12303.4	4304	14435.4	2225.8	2419.6		0.33953	0	0.200986	0.0141918	0.00977987	0.0028043	0.0174384	0.00746486	0.285081	0.0279238	0.0326821	0.0114329	0.0383454	0.00591249	0.00642729		0.591955	0.0730973	0	0.46998	12.0025	3.6	0.716381	0.166484	0.117135	0.197779	0.0530411	0.760128	0.737411	0.117135
LGC-2-49	192	3452.5		141663	0	85097.7	6919.9	3939.2	1440.9	6928.6	3358.6	17086	12786.6	12520.1	3994.2	16565.3	2731.9	0		0.449678	0	0.270124	0.0219657	0.0125041	0.00457382	0.0219933	0.0106611	0.0542358	0.0405883	0.0397423	0.0126787	0.0525829	0.00867182	0		0.600705	0.0798893	0	0.437407	10.2034	3.6	0.36031	0.385684	0.254006	0.203888	0.0939862	0.41674	0.37375	0.254006
LGC-2-54	197	3523.9		134094	0	79460.3	7833.4	4499.5	1358	5880.1	2948.9	19100.7	11265.7	10300.4	3516.8	13195.9	1713.7	0		0.454299	0	0.269204	0.0265388	0.0152439	0.00460077	0.0199212	0.00999059	0.0647113	0.0381671	0.0348968	0.0119146	0.0447064	0.00580585	0		0.59257	0.0926405	0	0.427839	9.67497	3.6	0.411201	0.369289	0.21951	0.18452	0.111965	0.472638	0.421845	0.21951
LGC-2-59	202	3597.5		125390	0	74900.2	6899.3	3655.8	2012.3	5539.7	2393.4	30353.3	9974.1	10477.3	3328	13762	1764.4	0		0.43171	0	0.257876	0.0237538	0.0125867	0.00692821	0.0190728	0.00824031	0.104504	0.0343401	0.0360726	0.0114581	0.0473816	0.00607471	0		0.597336	0.091096	0	0.451016	10.9551	3.6	0.493431	0.306466	0.200103	0.189284	0.081116	0.549625	0.504912	0.200103
LGC-2-64	207	3671		152770	0	95241.7	8214.1	4062.4	1469.9	6981.4	3248	7238.1	13039	13680.7	4440.6	14879.3	2393.3	0		0.466248	0	0.290674	0.0250691	0.0123983	0.00448607	0.0213069	0.00991276	0.0220904	0.0397945	0.0417529	0.0135525	0.045411	0.00730425	0		0.623432	0.0825528	0	0.402454	8.27296	3.6	0.265059	0.472839	0.262102	0.185963	0.0728491	0.313763	0.275048	0.262102
LGC-2-69	212	3743.2		125063	0	75880.1	7168.3	3355	1321.5	4473.1	2754.3	4413.4	8084.9	9835.3	3602.3	11371.5	1413.7	0		0.483361	0	0.293272	0.027705	0.0129669	0.00510751	0.0172882	0.0106452	0.0170575	0.0312476	0.0380128	0.0139227	0.0439501	0.00546386	0		0.606734	0.0865165	0	0.394815	7.85101	3.6	0.253345	0.468405	0.278251	0.160609	-0.00109145	0.300632	0.261387	0.278251
LGC-2-74	217	3814.9		129676	0	82918	7835.7	3586.3	1453.5	4947.1	2586.6	3088.8	9117.6	10594.2	3458.5	11993.5	1913	0		0.474711	0	0.303541	0.0286844	0.0131285	0.00532088	0.01811	0.00946885	0.0113073	0.0333771	0.0387825	0.0126606	0.043905	0.00700298	0		0.639422	0.0903214	0	0.391426	7.66383	3.6	0.222697	0.485758	0.291545	0.167324	0.0281887	0.264468	0.232002	0.291545
LGC-2-79	222	3874.6		145128	0	93616.7	8524.7	4031.4	1415.3	4898.6	2535.8	1298.7	8295.1	10143.9	3089.9	11613.7	1840.8	0		0.489582	0	0.315811	0.0287576	0.0135997	0.00477444	0.0165252	0.00855438	0.00438109	0.0279831	0.0342199	0.0104236	0.0391782	0.00620984	0		0.645062	0.0878154	0	0.389846	7.57661	3.6	0.199767	0.492466	0.307767	0.145981	0.0172576	0.2407	0.208548	0.307767
LGC-2-84	227	3933.8		137154	0	86699.6	8634.7	3420	1487.6	5737.2	2848.4	3706.2	10480.4	13188.3	4133.6	14335	1779.3	0		0.467138	0	0.295295	0.0294094	0.0116484	0.00506669	0.0195406	0.00970151	0.0126231	0.0356957	0.0449187	0.0140788	0.0488243	0.00606021	0		0.632136	0.0898651	0	0.36239	6.06019	3.6	0.218683	0.494629	0.286688	0.182179	0.00487158	0.258107	0.225831	0.286688
LGC-2-89	232	3992		132711	0	79665.8	7638.3	3255.3	1613.3	5560.1	2709.7	20244.1	10293.5	12628.4	3887.9	14512.9	1941.4	0		0.447348	0	0.268541	0.0257475	0.0109731	0.00543818	0.0187422	0.00913396	0.0682396	0.0346977	0.0425683	0.0131055	0.0489207	0.00654415	0		0.600294	0.0861249	0	0.389273	7.54494	3.6	0.397251	0.37351	0.229239	0.186209	0.0143563	0.44898	0.408295	0.229239
LGC-2-94	237	4051.1		122849	0	71043.8	5992.4	3447.5	1299.3	5133.8	3213.4	45270.3	10108.5	13339.4	4697.3	14188.4	2771.6	0		0.404968	0	0.234194	0.0197538	0.0113646	0.0042831	0.0169234	0.0105929	0.149232	0.0333224	0.0439729	0.0154845	0.0467716	0.0091365	0		0.578301	0.0803903	0	0.442007	10.4575	3.6	0.543112	0.285093	0.171794	0.193267	-0.035821	0.593275	0.5588	0.171794
LGC-2-99	242	4110.8		137738	0	78182.9	6800.9	3584.8	1352.2	5803.8	4050.3	8789.4	11493.7	16481	6668.3	16227.3	2832.8	0		0.459119	0	0.260605	0.0226692	0.0119491	0.00450725	0.0193456	0.0135007	0.0292974	0.0383116	0.0549356	0.0222272	0.05409	0.00944249	0		0.567619	0.0785269	0	0.420603	9.27534	3.6	0.257697	0.478848	0.263455	0.19575	-0.0744331	0.298332	0.268199	0.263455
LGC-2-104	247	4169.8		158667	0	82635.3	7674.7	4289.9	1591.5	6702.5	3467.4	18606.9	13031.1	16635.6	7090	17657.8	3263.8	1282.2		0.463132	0	0.241203	0.0224016	0.0125217	0.00464541	0.0195639	0.010121	0.0543115	0.0380364	0.0485575	0.0206949	0.0515412	0.00952668	0.0037426		0.520809	0.0787123	0	0.433856	10.0073	3.6	0.327988	0.41894	0.253071	0.190715	-0.00805455	0.370991	0.345911	0.253071
LGC-2-109	252	4231.4		164489	0	85865.7	8369.6	4249.1	1408.5	5779.5	3444.3	4365.9	12069.2	20907.1	7955.1	21470	5053.1	1905.4		0.47358	0	0.247215	0.0240969	0.0122336	0.0040552	0.0166397	0.00991646	0.0125698	0.0347483	0.0601935	0.0229035	0.0618141	0.0145483	0.00548582		0.522014	0.0785765	0	0.403331	8.32136	3.6	0.163831	0.493449	0.34272	0.19292	-0.134917	0.184328	0.178833	0.34272
LGC-2-114	257	4291.6		177076	0	93732.1	9828.4	4631.8	1876	6346.3	3984.7	5306.9	12404.1	20845.1	9262.1	23623.2	5366.4	2345.6		0.470161	0	0.248871	0.0260957	0.0122981	0.00498103	0.0168503	0.0105799	0.0140905	0.0329346	0.0553466	0.0245921	0.0627228	0.0142485	0.00622788		0.529333	0.0844631	0	0.398367	8.0472	3.6	0.174756	0.475069	0.350175	0.19309	-0.121963	0.197564	0.191237	0.350175
LGC-2-119	262	4351.5		192092	0	98625.8	9717.6	5627	1549.2	6032.8	3848.4	34760.8	12944.8	21962.2	10405.5	24095.2	5412.7	3100.9		0.446544	0	0.229269	0.0225899	0.0130807	0.00360133	0.0140241	0.00894613	0.0808063	0.030092	0.0510542	0.024189	0.0560126	0.0125826	0.00720847		0.513431	0.0808372	0	0.424783	9.50619	3.6	0.364236	0.369707	0.266057	0.18316	-0.133557	0.396177	0.391426	0.266057
LGC-2-129	272	4461.7		200921	0	115398	10541.3	4739.2	1411.1	6966.5	3633.2	17711.8	13787.9	18481.2	8431.5	22053.4	4609.8	1754.2		0.466781	0	0.268093	0.0244896	0.0110101	0.00327827	0.0161846	0.00844066	0.0411481	0.0320321	0.0429356	0.0195881	0.0512345	0.0107095	0.00407536		0.574343	0.0767031	0	0.368467	6.39579	3.6	0.290584	0.417744	0.291671	0.175637	-0.027565	0.326057	0.310892	0.291671
LGC-2-134	277	4515.6		228480	0	134392	10994	5077.2	2689.7	5878.1	3674.3	26094.8	13864.3	20763.2	9659.1	24144.9	4938	2021.4		0.463757	0	0.272783	0.0223151	0.0103054	0.00545942	0.0119311	0.00745791	0.0529659	0.0281411	0.0421441	0.0196056	0.0490081	0.0100229	0.00410294		0.588202	0.0758811	0	0.413994	8.9103	3.6	0.321036	0.398841	0.280123	0.161133	-0.0926568	0.351253	0.342502	0.280123
LGC-2-139	282	4569.8		193320	0	123093	9858.1	4804.4	1894.8	5265.9	3211.1	47400.9	12159.7	16820.3	7583.7	19780.2	3953.4	1596.3		0.428893	0	0.27309	0.0218708	0.0106589	0.00420374	0.0116827	0.00712404	0.105162	0.0269771	0.0373169	0.0168249	0.0438837	0.00877088	0.0035415		0.636733	0.0788905	0	0.404607	8.39185	3.6	0.47446	0.310463	0.215077	0.161396	-0.0605236	0.51126	0.497924	0.215077
LGC-2-144	287	4621.8		209558	0	128751	9170.5	4704.5	1661.1	5033.5	3433.2	25827	11326.8	18222.7	8095.4	18123.3	3689.3	1268.7		0.466862	0	0.286837	0.0204304	0.0104809	0.00370067	0.0112138	0.00764862	0.0575384	0.0252343	0.0405973	0.0180353	0.0403758	0.00821917	0.00282646		0.614393	0.0690204	0	0.40973	8.67478	3.6	0.360911	0.396179	0.24291	0.141302	-0.121785	0.396215	0.380779	0.24291
LGC-2-149	292	4674.2		210078	0	131173	9420	4555.1	1737.6	5543.8	3486.4	42734.4	12117.5	17430.4	8457.6	17108.2	3664.9	1209.9		0.448199	0	0.279855	0.0200974	0.00971823	0.00370714	0.0118276	0.00743818	0.0911731	0.0258525	0.0371875	0.0180442	0.0365001	0.007819	0.0025813		0.624399	0.0695895	0	0.400485	8.16418	3.6	0.463205	0.340085	0.19671	0.142004	-0.0734726	0.503925	0.484332	0.19671
LGC-2-154	297	4729		219855	0	137725	10390.4	5831.9	1932.9	5560.5	3461.3	10869.2	12468.5	17695.1	8093.2	17447.8	3294.8	1015.7		0.482518	0	0.302266	0.0228039	0.0127993	0.00424216	0.0122037	0.00759656	0.0238548	0.0273648	0.0388357	0.0177622	0.0382929	0.00723114	0.00222917		0.626435	0.0762792	0	0.42769	9.66675	3.6	0.24893	0.478772	0.272298	0.138944	-0.0694701	0.280612	0.263124	0.272298
LGC-2-159	302	4783.8		183120	0	117857	8156.5	4352.2	1623.3	6430.1	4324.4	22562.1	13453.4	20574.8	7800	17964	4020.3	1220.9		0.442897	0	0.285052	0.0197275	0.0105263	0.00392614	0.015552	0.0104591	0.0545691	0.0325386	0.0497626	0.0188652	0.0434481	0.00972357	0.00295289		0.643608	0.0716445	0	0.422835	9.39858	3.6	0.338755	0.425299	0.235945	0.171281	-0.0976926	0.380346	0.357824	0.235945
LGC-2-164	307	4837.5		195015	0	126467	8664.7	4761.7	1694.6	6142.8	4242.8	22977.6	13185.9	21904.9	10022.1	19136.9	3977.8	1156.4		0.443871	0	0.28785	0.0197216	0.010838	0.00385706	0.0139815	0.00965698	0.052299	0.0300122	0.0498574	0.0228112	0.0435572	0.00905382	0.00263207		0.648499	0.0719581	0	0.426976	9.6273	3.6	0.324712	0.439067	0.236222	0.164748	-0.131231	0.361224	0.341791	0.236222
LGC-2-169	312	4891.6		207853	0	133084	9655	5346.1	1988.7	6502	4494.3	30878.8	14458.3	21892.2	9196	21064	4836.6			0.441069	0	0.282406	0.0204881	0.0113445	0.00422006	0.0137974	0.009537	0.0655254	0.0306808	0.0464557	0.0195141	0.0446982	0.0102634	0		0.640276	0.0755629	0	0.431718	9.88921	3.6	0.369522	0.40192	0.228557	0.168179	-0.0999843	0.409233	0.385997	0.228557
LGC-2-174	317	4943.4		173717	0	112421	7630.2	4258.6	1621.5	5380.7	3883.3	76356.5	12938	20035.7	8668.2	19556.5	3468.2			0.386093	0	0.249861	0.0169584	0.00946492	0.00360385	0.0119588	0.0086308	0.169706	0.0287552	0.0445302	0.0192654	0.0434651	0.00770822	0		0.647153	0.07216	0	0.435231	10.0832	3.6	0.569713	0.277082	0.153205	0.179001	-0.115848	0.607138	0.583171	0.153205
LGC-2-179	322	4991.1		158420	0	87978.6	6279.6	3765.6	1346.5	4793.9	3351.4	39644.8	10627.7	16385.5	7023.1	16296.3	3254.9	1153.2		0.439663	0	0.244167	0.0174278	0.0104507	0.00373695	0.0133045	0.00930115	0.110026	0.0294951	0.0454747	0.0194912	0.0452272	0.00903333	0.00320048		0.555351	0.0670843	0	0.448757	10.8303	3.6	0.466105	0.331962	0.201933	0.166815	-0.10715	0.506329	0.487044	0.201933
LGC-2-184	327	5041.2		173027	0	96477.8	7348.2	4063.7	1591.5	5052.1	3528	46772.5	10486.4	16589.1	7757.6	15789.7	3354.7			0.441578	0	0.246218	0.0187531	0.0103709	0.00406162	0.0128933	0.00900371	0.119367	0.0267621	0.0423366	0.019798	0.0402965	0.00856144	0		0.557588	0.0698993	0	0.434902	10.0651	3.6	0.506289	0.318605	0.175106	0.153303	-0.112156	0.549405	0.522316	0.175106
LGC-2-189	332	5089.4		198833	0	117748	9416	4929.3	1829	5249.9	3887.2	82119.1	10991.9	19120.9	8910.4	17119.8	4037.8	1117.7		0.409703	0	0.242625	0.019402	0.010157	0.00376872	0.0108176	0.00800971	0.169209	0.0226492	0.0393993	0.0183602	0.035276	0.00832003	0.00230306		0.592196	0.0752266	0	0.417842	9.12283	3.6	0.598187	0.255798	0.146015	0.143679	-0.151247	0.636297	0.619109	0.146015
LGC-2-194	337	5137.9		234637	0	141100	10815.4	5532.1	2165.8	5566.2	3950	66245	12941.7	20447.9	8612.2	19729.6	3961.2	1289.2		0.436946	0	0.262759	0.0201407	0.010302	0.0040332	0.0103655	0.00735578	0.123363	0.0241003	0.0380785	0.0160378	0.0367409	0.00737664	0.00240078		0.601353	0.0731317	0	0.415804	9.01026	3.6	0.530752	0.294248	0.175	0.140129	-0.119995	0.568663	0.55102	0.175
LGC-3-3	342	5186.6		365883	0	256420	16312	8222.6	2890.5	5723.1	3355.2	61066.1	13218	13186.2	8392.4	19935.8	6512.7	1524.9		0.467497	0	0.327634	0.0208422	0.0105062	0.00369326	0.00731254	0.00428702	0.0780256	0.0168889	0.0168483	0.0107232	0.0254724	0.00832143	0.0019484		0.700825	0.0697293	0	0.405216	8.42551	3.6	0.527741	0.261797	0.210462	0.0960493	0.0588329	0.566429	0.561709	0.210462
LGC-3-8	347	5235.5		462289	0	323639	22084.9	10547.9	3909.4	5873.1	2834.1	30752.5	13737.8	16419.7	10715.4	21598.8	6973.2	1945.9		0.495317	0	0.34676	0.0236627	0.0113015	0.0041887	0.00629269	0.00303658	0.0329496	0.0147193	0.0175928	0.0114809	0.0231419	0.00747139	0.00208492		0.700078	0.0732556	0	0.395633	7.89621	3.6	0.355972	0.368721	0.275307	0.0818466	0.00798107	0.386317	0.38712	0.275307
LGC-3-13	352	5284.9		409647	0	285652	18235.3	9086.9	4149.7	5576.8	2671	43201.4	12724.6	13043.1	7178.3	19259.8	5087.8	1014.2		0.489699	0	0.341473	0.0217988	0.0108626	0.00496063	0.00666661	0.00319296	0.0516437	0.0152112	0.015592	0.00858107	0.0230235	0.00608205	0.00121239		0.697312	0.0713456	0	0.420585	9.27431	3.6	0.468756	0.300172	0.231072	0.0839904	0.0661948	0.506843	0.49635	0.231072
LGC-3-18	357	5333.2		404389	0	289953	19480.3	9589.1	3131.1	5583	2455.4	75173.8	14123.2	12731.6	7361.9	21724.4	4577.2	1209.4		0.464024	0	0.332713	0.0223531	0.0110032	0.00359284	0.00640633	0.0028175	0.0862597	0.0162059	0.0146091	0.00844756	0.0249281	0.0052522	0.00138775		0.717015	0.0737547	0	0.395031	7.86296	3.6	0.574115	0.236075	0.18981	0.0929313	0.113131	0.607825	0.597989	0.18981
LGC-3-23	362	5381.9		507063	0	342394	25495.7	12261	4561.1	7269.1	2610.1	26366.9	16835.3	16448	9778.6	29714	7892.6	2363.6		0.50152	0	0.338651	0.025217	0.012127	0.00451123	0.00718963	0.00258156	0.0260786	0.0166512	0.0162682	0.00967169	0.0293891	0.00780631	0.00233776		0.67525	0.0770281	0	0.397518	8.00033	3.6	0.303879	0.361021	0.335101	0.0959532	0.102017	0.33132	0.332466	0.335101
LGC-3-28	367	5435.1		634043	0	451487	33569.6	16151.1	5055.3	7547.6	3396.4	57490	18621.8	21984.1	14150	33481.4	11151.6	5177.7		0.482784	0	0.343779	0.0255611	0.012298	0.00384929	0.00574702	0.00258614	0.043775	0.0141793	0.0167395	0.0107743	0.025494	0.00849124	0.00394249		0.712077	0.0795216	0	0.387148	7.42755	3.6	0.395571	0.316507	0.287922	0.0859901	0.0132936	0.422285	0.4368	0.287922
LGC-3-32	371	5482.2		759686	0	508323	40435.4	18960.4	5764.4	7833.1	4347.6	5118.7	18365.8	24359.3	15285.9	38499.1	12599.9	4530.4		0.518873	0	0.347189	0.0276177	0.0129501	0.00393714	0.00535008	0.00296945	0.00349612	0.012544	0.0166376	0.0104404	0.0262952	0.00860585	0.0030943		0.669122	0.0789967	0	0.379446	7.0022	3.6	0.132117	0.443036	0.424847	0.0784804	-0.0397032	0.145668	0.152003	0.424847
LGC-3-38	377	5553		817108	0	568932	40576.4	19176.1	6080.9	7499.4	4297.7	22993.6	21912.3	26088.3	18366.7	48173	14529.8	6714.8		0.503626	0	0.350663	0.0250093	0.0118192	0.00374797	0.00462227	0.0026489	0.0141722	0.0135057	0.0160796	0.0113204	0.0296915	0.00895547	0.00413868		0.696276	0.0745615	0	0.38365	7.23439	3.6	0.203961	0.389079	0.406961	0.0867166	-0.0141534	0.219115	0.232977	0.406961
LGC-3-43	382	5611.8		810519	0	560256	39470.5	18811.5	6305	7237.7	4357.8	9486.1	19494.2	24894	15780	43721.7	13429.8	4966.1		0.5134	0	0.354878	0.0250014	0.0119156	0.00399372	0.00458451	0.00276032	0.0060087	0.012348	0.0157684	0.00999538	0.0276942	0.00850672	0.00314563		0.691231	0.0738048	0	0.388879	7.52315	3.6	0.147046	0.419678	0.433276	0.0799726	-0.0391228	0.159986	0.168691	0.433276
LGC-3-48	387	5671.6		390778	0	271985	16896.1	8488.9	2922.6	4133.4	2494.6	15068.3	11079	10652.6	6585.8	16651.8	4274.7			0.512825	0	0.35693	0.0221731	0.0111401	0.00383538	0.00542434	0.00327371	0.0197744	0.0145392	0.0139796	0.00864267	0.0218525	0.00560977	0		0.696008	0.0675461	0	0.403125	8.30999	3.6	0.305839	0.399173	0.294988	0.0753929	0.0633645	0.337359	0.32545	0.294988
LGC-3-53	392	5730.7		426119	0	311373	19258.2	9234.6	3552.4	5497.6	2573.4	1620.6	14547.6	11431.3	6464.3	19662.4	4048.1			0.510088	0	0.372731	0.0230531	0.0110543	0.00425242	0.00658094	0.0030805	0.00193995	0.0174143	0.0136839	0.00773813	0.023537	0.0048458	0		0.730719	0.0699426	0	0.39903	8.08383	3.6	0.147187	0.492719	0.360094	0.0852412	0.155737	0.167749	0.156829	0.360094
LGC-3-58	397	5789.3		370902	0	237841	16712.7	7773.3	3381	5097.1	2603.1	5945.2	13055.4	12328.9	7799.1	19671.9	5882.1	1160.8		0.522285	0	0.334914	0.0235339	0.0109459	0.00476094	0.00717746	0.00366555	0.00837171	0.0183839	0.0173609	0.0109823	0.0277009	0.00828286	0.00163458		0.641249	0.0698825	0	0.400269	8.15226	3.6	0.185542	0.451207	0.363251	0.0925421	0.0848185	0.20724	0.205192	0.363251
LGC-3-63	402	5848.4		551424	0	417778	26644.5	12671.1	4629.4	5218.8	2763.6	2854.6	12940.3	12215.5	8135.9	21133.2	6012	1350.7		0.507864	0	0.384775	0.0245397	0.0116701	0.00426369	0.00480653	0.00254529	0.0026291	0.0119181	0.0112505	0.00749319	0.0194638	0.00553707	0.001244		0.757635	0.0738114	0	0.393685	7.78863	3.6	0.149219	0.458408	0.392373	0.0665164	0.0836086	0.167646	0.166054	0.392373
LGC-3-68	407	5906.1		465775	0	337092	23197.3	10286.9	3392.6	6316	3106.4	2171.1	16879	12250.6	6723.3	21929.8	3859.8			0.51017	0	0.369222	0.0254083	0.0112674	0.00371596	0.00691801	0.00340249	0.00237804	0.0184878	0.0134183	0.00736413	0.02402	0.0042277	0		0.723722	0.0733645	0	0.370951	6.53302	3.6	0.158303	0.489553	0.352144	0.0883242	0.179088	0.181678	0.167111	0.352144
LGC-3-73	412	5964.1		441871	0	315491	21520.9	10102.3	4638.7	5995.1	2692.8	4344.8	15269	13272.9	7483	22172.3	5327.3	1114.4		0.507143	0	0.362094	0.0246999	0.0115946	0.00532392	0.00688068	0.00309057	0.0049866	0.0175245	0.0152335	0.00858837	0.0254475	0.00611423	0.00127902		0.713989	0.0758407	0	0.406515	8.49722	3.6	0.167792	0.46381	0.368397	0.0895029	0.124459	0.188924	0.182967	0.368397
LGC-3-78	417	6026.1		696404	0	490557	34037.6	18457.7	6159.3	5979.4	3818.3	3875.2	15656.8	17287.3	13505.1	32821.3	8780.7	2002.9		0.516106	0	0.363553	0.0252253	0.013679	0.00456467	0.00443134	0.00282975	0.00287192	0.0116033	0.0128116	0.0100087	0.0243239	0.00650739	0.00148435		0.704415	0.0776822	0	0.419694	9.22513	3.6	0.131816	0.447802	0.420381	0.0725267	0.0107833	0.145566	0.14711	0.420381
LGC-3-83	422	6097.7		962594	0	753035	59369.8	23878.7	7422.4	7242.9	2722.1	3037.9	18430	14971	8184.2	30625.8	5811.1	1546		0.50693	0	0.39657	0.0312658	0.0125752	0.00390885	0.00381432	0.00143354	0.00159985	0.00970577	0.00788416	0.00431003	0.0161284	0.00306029	0.000814168		0.782297	0.0860855	0	0.345217	5.11166	3.6	0.140464	0.449225	0.410311	0.0552548	0.161671	0.157409	0.152591	0.410311
LGC-3-88	427	6169.5		636661	0	492023	29643.8	15085.9	5344.8	7584.9	2435.3	9257.4	17361	12682.8	6210.2	24540.4	7106.4	1472.9		0.502332	0	0.388212	0.0233893	0.0119029	0.0042171	0.00598457	0.00192148	0.00730418	0.013698	0.0100069	0.00489991	0.0193626	0.00560702	0.00116213		0.772818	0.0729167	0	0.408006	8.57958	3.6	0.217454	0.408951	0.373595	0.072122	0.217502	0.245165	0.240753	0.373595
LGC-3-93	432	6243		544214	0	386961	25853	12069.1	4420.4	7545.8	2259.4	13233.1	16019.4	12420.9	5968.2	21025.4	7162.3	1973.8		0.512865	0	0.36467	0.0243637	0.0113739	0.00416576	0.00711112	0.00212925	0.0124708	0.0150966	0.0117054	0.0056244	0.0198142	0.00674971	0.0018601		0.711046	0.0721882	0	0.389431	7.55369	3.6	0.262969	0.392754	0.344277	0.0757307	0.205536	0.29611	0.293585	0.344277
LGC-3-98	437	6317.2		607310	0	420650	27286.2	13762	4821.2	5400.3	2964.1	8238.3	13950	16373.5	9831.2	21595.5	7453	2032.5		0.522792	0	0.362108	0.0234888	0.0118468	0.00415024	0.00464875	0.00255159	0.00709179	0.0120086	0.0140948	0.008463	0.0185901	0.00641578	0.00174964		0.692643	0.0702248	0	0.405133	8.42089	3.6	0.189014	0.457143	0.353843	0.063163	0.00028513	0.208907	0.211896	0.353843
LGC-3-103	442	6393		905384	0	619500	42108.4	19969.7	5888.2	5462.5	4695.6	5073.2	13985.8	20051.6	14909.1	26834.2	8816.8	2775.9		0.534007	0	0.365388	0.024836	0.0117784	0.00347293	0.00322185	0.00276952	0.00299223	0.00824899	0.0118267	0.00879357	0.0158271	0.00520026	0.00163726		0.68424	0.0698271	0	0.380452	7.05773	3.6	0.148446	0.47704	0.374514	0.0486331	-0.104644	0.164758	0.167355	0.374514
LGC-3-108	447	6464.5		997545	0	730012	48438.1	22165	7243.7	6419.1	3868.7	13634.1	16895.5	20146.4	13416.9	26857.4	8694.7	1886.6		0.520307	0	0.380765	0.0252647	0.011561	0.00377822	0.00334812	0.00201787	0.00711138	0.00881248	0.0105081	0.00699809	0.0140085	0.00453505	0.000984027		0.731809	0.0723892	0	0.377777	6.90998	3.6	0.213933	0.451253	0.334814	0.047887	-0.0128564	0.23561	0.236293	0.334814
LGC-3-113	452	6537.5		1.09466e+06	0	770735	53502.1	26302.2	8536.9	8195.1	5488.9	7994.6	17260.5	19076.5	13866.9	27680.7	7547.7	1604.7		0.530756	0	0.373699	0.0259411	0.0127529	0.00413921	0.00397348	0.00266135	0.00387627	0.00836894	0.00924945	0.00672352	0.0134213	0.00365958	0.000778056		0.704089	0.0746758	0	0.39437	7.82644	3.6	0.199407	0.461791	0.338802	0.0462944	0.0154595	0.22812	0.217737	0.338802
LGC-3-118	457	6610.1		1.28453e+06	0	917212	64905.8	30741.8	8961.5	9286	9929.7	26921.5	18889.5	26415.1	18157.4	29200.3	9026.3	2381.8		0.522898	0	0.373373	0.0264214	0.0125142	0.00364799	0.00378008	0.00404212	0.010959	0.00768941	0.0107529	0.00739139	0.0118867	0.00367437	0.000969567		0.714044	0.0753049	0	0.37954	7.00735	3.6	0.307156	0.422495	0.270349	0.0427569	-0.110571	0.352214	0.332402	0.270349
LGC-3-123	462	6683.3		1.49333e+06	0	1.08965e+06	77447.3	34231.2	10269.5	10470.5	7835.8	8051.1	21561.6	24843	17093.4	33854.8	9540.7	1769.9		0.525829	0	0.383688	0.0272706	0.0120534	0.00361608	0.00368686	0.00275913	0.00283494	0.00759224	0.00874769	0.00601891	0.0119209	0.00335946	0.000623215		0.729682	0.0754967	0	0.364915	6.19964	3.6	0.19521	0.470283	0.334507	0.0422565	-0.00868069	0.225828	0.213058	0.334507
LGC-3-128	467	6758.2		973875	0	673604	49742.7	24164.7	6173.5	7363.8	8815.3	12747.9	17113.1	26152.1	18494.8	28020.9	8760.5	2147.1		0.524385	0	0.362703	0.0267841	0.0130115	0.00332414	0.00396506	0.00474662	0.00686414	0.00921459	0.0140817	0.00995857	0.0150879	0.00471711	0.00115611		0.691674	0.0759813	0	0.378844	6.96895	3.6	0.223175	0.476486	0.300338	0.0511489	-0.154907	0.255006	0.243682	0.300338
LGC-3-133	472	6842.9		1.16131e+06	0	800194	58270.3	25937.9	8636.9	8683.3	6243.2	9113.1	15863.8	22690.4	13220.4	26243.1	9409.4	2312.6		0.535628	0	0.369071	0.0268759	0.0119633	0.00398358	0.00400498	0.00287954	0.00420321	0.00731682	0.0104654	0.00609761	0.012104	0.00433987	0.00106663		0.689045	0.07403	0	0.372392	6.6126	3.6	0.211283	0.455044	0.333673	0.0419027	-0.0714023	0.243186	0.23555	0.333673
LGC-3-138	477	6928.6		1.15528e+06	0	816427	56993.2	27360.3	8743	8092.1	6006.7	5861	18059.6	21392.7	14804.3	26257.3	7366.8	2415		0.531149	0	0.375358	0.026203	0.0125791	0.00401965	0.0037204	0.00276162	0.00269464	0.00830303	0.00983544	0.00680638	0.012072	0.00338694	0.00111031		0.70669	0.0745739	0	0.387805	7.46386	3.6	0.181032	0.492099	0.326869	0.043396	-0.0202411	0.207576	0.198657	0.326869
LGC-3-143	482	7016.6		953962	0	699472	46512.1	22627.9	7622.3	7051.5	4981.9	9285.2	17419.7	18894.7	11548.4	24115.6	6923.2	1464.8		0.520756	0	0.381832	0.0253903	0.0123523	0.00416091	0.00384932	0.00271955	0.00506867	0.00950919	0.0103144	0.00630412	0.0131644	0.00377928	0.000799615		0.733228	0.0744741	0	0.394076	7.81023	3.6	0.209653	0.470697	0.31965	0.0484633	0.0106828	0.237794	0.228503	0.31965
LGC-3-148	487	7104.3		920202	0	687118	46466.9	23936.5	8116.7	6335	4821.1	3903.9	13961.2	13913.9	8525.2	20986.9	4200.7	1506.5		0.521658	0	0.389524	0.0263419	0.0135695	0.00460132	0.00359128	0.00273306	0.0022131	0.00791453	0.00788772	0.00483289	0.0118974	0.00238136	0.000854027		0.746703	0.0786205	0	0.408216	8.59121	3.6	0.192695	0.465749	0.341556	0.0429368	0.034761	0.224782	0.207876	0.341556
LGC-3-153	492	7187.6		671586	0	502601	33750.6	16270.3	5195.9	6977	3875.9	13553.2	15841.4	13831.5	7004.6	21923.8	5124.8	1249.4		0.509246	0	0.381109	0.0255922	0.0123373	0.00393991	0.00529047	0.00293899	0.010277	0.0120121	0.0104881	0.0053114	0.0166242	0.003886	0.000947387		0.74838	0.0759722	0	0.388762	7.51672	3.6	0.273055	0.410347	0.316598	0.0624605	0.11013	0.310792	0.294023	0.316598
LGC-3-158	497	7270.6		870866	0	639732	46260.1	23642.2	7063.7	14523.4	2586.6	1951.4	22356.6	19114.9	6506.7	34432.5	16582.9	9625.1		0.507721	0	0.372968	0.02697	0.0137836	0.00411819	0.00846725	0.00150801	0.00113768	0.0130341	0.0111441	0.00379346	0.0200744	0.00966796	0.00561151		0.734592	0.0812022	0	0.398954	8.07963	3.6	0.14929	0.375769	0.474941	0.075689	0.230301	0.172392	0.187849	0.474941
LGC-3-163	502	7354.2		638347	0	470530	29170.4	14101	4233.3	12115.7	4184.6	4524.3	22833.2	19077.1	6320.2	29025.2	13090.2	7141.6		0.500785	0	0.369132	0.0228842	0.0110623	0.00332103	0.0095048	0.00328283	0.00354932	0.0179127	0.014966	0.00495821	0.0227703	0.0102693	0.0056026		0.737107	0.0692638	0	0.385947	7.36124	3.6	0.176014	0.407655	0.416331	0.0910896	0.176792	0.204139	0.212322	0.416331
LGC-3-168	507	7438		452233	0	335769	20772.1	10654.6	2722.1	6459.3	7885.4	56914	13207.4	13094	10504.7	20546.6	6610.1	1379.6		0.47169	0	0.350214	0.0216658	0.011113	0.00283921	0.0067372	0.00822465	0.0593626	0.0137756	0.0136573	0.0109566	0.0214306	0.00689449	0.00143895		0.742468	0.0702098	0	0.391718	7.67998	3.6	0.521655	0.269442	0.208902	0.0816602	-0.0280616	0.582863	0.554062	0.208902
LGC-3-173	512	7521.5		991906	0	762555	50932.6	25649.8	7656	10307.2	5136.4	25442.6	19291	17927.1	11194.7	29334.2	12161.4	4555.2		0.502473	0	0.38629	0.0258011	0.0129935	0.00387832	0.00522135	0.00260196	0.0128885	0.0097723	0.00908139	0.00567093	0.0148599	0.00616064	0.00230754		0.768778	0.078278	0	0.395376	7.88198	3.6	0.302078	0.357687	0.340235	0.0560813	0.10834	0.340985	0.344644	0.340235
LGC-3-183	522	7672.3		529174	0	393188	25487.8	14436.1	5355.6	68370.9	14635.1	23913.5	43989.1	43812	7696.9	55590.4	38618.9	20662.3		0.411831	0	0.306	0.0198359	0.0112349	0.00416801	0.0532098	0.0113898	0.0186107	0.0342346	0.0340968	0.00599013	0.0432633	0.0300552	0.0160805		0.743023	0.0788219	0	0.437101	10.1865	3.6	0.336978	0.300981	0.362041	0.240919	0.283849	0.456369	0.414404	0.362041
LGC-3-188	527	7743.2		159100	0	127792	8520.7	5685.7	2433.2	101242	15564.6	51341.8	59890.4	32929.4	8703.8	34885.3	29694.8	10205.9		0.245528	0	0.197213	0.0131494	0.00877437	0.003755	0.156241	0.0240198	0.0792325	0.092425	0.0508178	0.013432	0.0538362	0.0458261	0.0157501		0.80322	0.0946835	0	0.487926	12.9937	3.6	0.488154	0.294734	0.217112	0.55198	0.521495	0.738623	0.552108	0.217112
LGC-3-193	532	7813.1		69768.3	0	60517.8	4047.1	2817.4	1049.3	42735.8	11435.6	15068.8	37829.2	16424.2	9073.3	30661.1	18702.9	7390.2		0.213019	0	0.184775	0.0123568	0.0086022	0.00320376	0.130483	0.0349156	0.0460087	0.115502	0.050147	0.027703	0.0936157	0.0571044	0.022564		0.867411	0.101874	0	0.488602	13.031	3.6	0.365729	0.334494	0.299777	0.614528	0.461168	0.512322	0.424193	0.299777
LGC-4-3	535	7856.2		334386	0	183022	15339.6	9059.6	2176.8	12173.2	4290.8	50924.3	15631.9	18336.6	7689.3	17830.5	6158.8	1292		0.492969	0	0.26982	0.0226144	0.0133561	0.00320914	0.0179463	0.0063257	0.0750751	0.0230453	0.0270327	0.0113359	0.0262866	0.0090796	0.00190473		0.547337	0.0736254	0	0.422803	9.39681	3.6	0.501672	0.310121	0.188207	0.120087	0.0894898	0.571749	0.531133	0.188207
LGC-4-8	540	7927.1		241869	0	145664	12008.2	7526.3	2095.6	21266.3	3162	151161	21120.6	15774.1	4551.5	17803	9415.3			0.37016	0	0.222926	0.0183776	0.0115184	0.00320714	0.0325463	0.00483918	0.231339	0.0323233	0.024141	0.0069657	0.027246	0.0144093	0		0.602243	0.082088	0	0.444838	10.6139	3.6	0.718881	0.169685	0.111434	0.199266	0.349941	0.798767	0.747702	0.111434
LGC-4-13	545	7999.1		150056	0	87978	6945.6	4542.9	1664.1	31746.7	3786.4	36757	23547.5	15906.2	2673.8	19736.5	13152.7	5437.1		0.371489	0	0.217805	0.017195	0.0112467	0.00411977	0.0785945	0.00937389	0.0909984	0.0582959	0.0393786	0.00661946	0.0488611	0.0325618	0.0134605		0.586302	0.0805877	0	0.471922	12.1097	3.6	0.473277	0.275805	0.250919	0.333341	0.448377	0.616753	0.538859	0.250919
LGC-4-18	550	8072.5		258269	0	158220	11029.5	6757.8	2194.7	23749	3472.2	22906.3	23678	17055.3	3300	21709.2	15965.4	6833.5		0.449054	0	0.275098	0.0191771	0.0117499	0.00381595	0.0412926	0.00603715	0.0398274	0.0411692	0.0296542	0.00573774	0.037746	0.0277592	0.0118815		0.612616	0.0718129	0	0.448028	10.79	3.6	0.361491	0.317543	0.320967	0.211164	0.36369	0.449785	0.432618	0.320967
LGC-4-23	555	8146.5		331854	0	222747	14865	8552.8	2743.7	28618.8	4084.4	29953	30461.9	19663.6	4109.3	27100.3	14716.2	6338.5		0.444959	0	0.298665	0.0199314	0.0114678	0.00367882	0.0383728	0.00547647	0.0401618	0.0408441	0.0263655	0.00550986	0.0363368	0.0197319	0.00849882		0.671219	0.0730735	0	0.431799	9.89367	3.6	0.379629	0.328604	0.291767	0.206157	0.395819	0.473439	0.435139	0.291767
LGC-4-28	560	8220.1		937601	0	578976	43188.7	24378.6	6262.3	23975.6	3966	44422.9	30063.6	24304.1	7813.3	23970.6	19836.1	11239.5		0.526743	0	0.325268	0.0242633	0.0136959	0.00351815	0.0134694	0.00222809	0.0249567	0.0168897	0.013654	0.0043895	0.0134666	0.0111439	0.00631433		0.617508	0.0729952	0	0.415022	8.96707	3.6	0.381686	0.327973	0.290341	0.0768107	0.281382	0.447661	0.456512	0.290341
LGC-4-33	565	8294		553586	0	328906	23691.1	14675.6	3376.2	26362.7	2554.9	87152.8	24745.3	15667.6	3367.1	19415.5	16564.2	8983.6		0.490312	0	0.291313	0.0209832	0.0129982	0.00299031	0.0233495	0.00226288	0.0771914	0.021917	0.0138768	0.00298225	0.0171963	0.0146709	0.00795679		0.594138	0.0701174	0	0.432452	9.92976	3.6	0.566712	0.213755	0.219533	0.112999	0.447881	0.65988	0.647476	0.219533
LGC-4-38	570	8375.7		296997	0	190098	13328.2	7570.3	2380.1	33422.7	2512.1	25410.6	25042.7	14248.2	2144.8	19511.3	13607.3	6439.6		0.45502	0	0.291243	0.0204197	0.0115982	0.00364647	0.0512058	0.00384871	0.0389307	0.0383671	0.0218292	0.00328598	0.0298926	0.0208473	0.0098659		0.640066	0.072683	0	0.427448	9.6534	3.6	0.43098	0.291105	0.277915	0.207952	0.542617	0.57653	0.501629	0.277915
LGC-4-43	575	8460.9		383281	0	238442	16728.5	9952	3606.3	30229.8	2791.6	17298.6	22033	12401	1955.8	19331.3	14287.6	6762.3		0.491953	0	0.306047	0.0214715	0.0127737	0.0046288	0.0388009	0.0035831	0.0222033	0.02828	0.0159171	0.00251033	0.0248123	0.0183386	0.00867962		0.622106	0.0732329	0	0.447664	10.7699	3.6	0.395937	0.286329	0.317735	0.157393	0.536561	0.534923	0.474533	0.317735
LGC-4-48	580	8547.8		366066	0	240829	14556.4	7930.6	3439.8	39738	3681	25899.5	32795.1	19007.1	3003.8	24074.1	13559.3	8554.1		0.455797	0	0.299862	0.0181245	0.00987457	0.00428298	0.0494787	0.0045833	0.0322481	0.0408339	0.0236662	0.0037401	0.0299752	0.016883	0.0106509		0.657885	0.0661411	0	0.438558	10.267	3.6	0.407009	0.321798	0.271193	0.208802	0.504738	0.546275	0.467741	0.271193
LGC-4-53	585	8634.6		532179	0	344259	22492.9	13142.8	4174.3	30931.4	3899.6	1699.8	24627.1	21717	4252.1	25085.2	21985.4	12350.1		0.500735	0	0.323918	0.0211639	0.0123663	0.00392766	0.0291038	0.00366919	0.00159937	0.023172	0.0204338	0.00400086	0.023603	0.0206864	0.0116204		0.646885	0.0695992	0	0.434994	10.0701	3.6	0.249276	0.345254	0.40547	0.131594	0.336229	0.326995	0.325551	0.40547
LGC-4-63	595	8808.7		377190	0	250768	15510.2	9813.4	3303	35405	4051.6	2387.1	26130.8	17001.5	3230.3	24291.2	13027.8	4548.5		0.479484	0	0.318776	0.0197166	0.0124748	0.00419878	0.0450069	0.0051504	0.00303448	0.0332175	0.0216123	0.00410636	0.030879	0.0165609	0.00578206		0.664832	0.0705408	0	0.458189	11.3512	3.6	0.321692	0.356433	0.321875	0.185365	0.465812	0.461763	0.371952	0.321875
LGC-4-68	600	8896		462141	0	269512	18437.7	9822.6	3258.8	25656.4	4794.2	3091.4	19748.5	17387.7	3929.3	20787.5	13584.8	6950.7		0.525696	0	0.306577	0.0209733	0.0111734	0.00370696	0.0291848	0.00545352	0.00351654	0.0224644	0.0197789	0.00446967	0.0236463	0.015453	0.00790659		0.583182	0.0638478	0	0.415031	8.96757	3.6	0.289329	0.354225	0.356446	0.125285	0.311104	0.392396	0.351612	0.356446
LGC-4-73	605	8980.1		598826	0	370792	23640.8	12166.3	4861.9	25308	4275.3	2783.8	25815.2	21491	4038.9	22875.9	18566.8	9700.7		0.522927	0	0.323795	0.0206444	0.0106243	0.00424567	0.0221003	0.00373342	0.00243096	0.0225432	0.0187671	0.00352698	0.0199765	0.0162135	0.00847117		0.619198	0.0635955	0	0.418702	9.17034	3.6	0.240013	0.380741	0.379246	0.109983	0.297566	0.307461	0.303665	0.379246
LGC-4-78	610	9065.8		739157	0	514908	35179.1	19728.1	6990.2	14570.7	4149.2	20350.4	24564.7	21599.3	6504.9	23620.3	20022.1	12464.3		0.504955	0	0.351759	0.0240326	0.0134772	0.00477535	0.00995397	0.00283452	0.0139024	0.0167814	0.0147555	0.00444382	0.0161362	0.0136781	0.00851498		0.696615	0.0772699	0	0.431655	9.88572	3.6	0.264264	0.356242	0.379494	0.0782575	0.181818	0.302575	0.338683	0.379494
LGC-4-83	615	9152.4		1.03138e+06	0	678636	51378	26192.7	7819.3	19579.7	3827.1	16941.3	26016.7	21090	1810.5	23521.4	21299.3	11852.2		0.531272	0	0.34957	0.0264651	0.013492	0.00402777	0.0100856	0.00197136	0.00872657	0.0134014	0.0108636	0.0009326	0.012116	0.0109714	0.00610514		0.657987	0.0764614	0	0.398314	8.04426	3.6	0.276474	0.335191	0.388335	0.0628058	0.262433	0.329288	0.357738	0.388335
LGC-4-88	620	9263.2		804695	0	501267	32798.5	17067.7	6010.5	26663.6	3979.6	18313.2	27699.7	16701.2	3862.1	22875.6	16085.1	7471.3		0.534507	0	0.332959	0.0217859	0.011337	0.00399239	0.0177109	0.00264339	0.0121643	0.0183991	0.0110935	0.00256534	0.0151948	0.0106843	0.0049627		0.622927	0.0649297	0	0.41302	8.85651	3.6	0.3408	0.335973	0.323227	0.087579	0.419738	0.433211	0.407647	0.323227
LGC-4-93	625	9378.4		537304	0	317387	20306.6	10867	3599.1	22086.9	3366	29155.3	19690.2	12418.2	2992.2	16936.4	11336.2	4364.2		0.531033	0	0.313683	0.0200696	0.0107402	0.00355709	0.0218291	0.00332671	0.028815	0.0194604	0.0122733	0.00295728	0.0167387	0.0112039	0.00431326		0.590703	0.0607833	0	0.416019	9.02214	3.6	0.446344	0.286897	0.266759	0.0985096	0.422716	0.563595	0.512055	0.266759
LGC-4-98	630	9495		601834	0	391662	27127.7	15131.4	4756.5	17250.7	4844.6	42870	22816.7	21938.7	7853.1	24290	17887.2	11421.9		0.496692	0	0.323238	0.0223884	0.0124879	0.00392553	0.014237	0.00399823	0.0353805	0.0188306	0.0181059	0.00648114	0.0200465	0.0147623	0.00942646		0.65078	0.0724599	0	0.423006	9.40807	3.6	0.37953	0.307341	0.313128	0.0966049	0.174927	0.435782	0.457941	0.313128
LGC-4-103	635	9614.5		932735	0	613342	47570.4	28473.8	8336.7	30135.6	6846.4	4910.9	37220.9	40171.6	10669	31738.3	39694.6	23635.3		0.502692	0	0.330557	0.0256378	0.0153458	0.00449302	0.0162414	0.00368983	0.0026467	0.02006	0.0216502	0.00575	0.0171052	0.0213932	0.0127381		0.657573	0.082961	0	0.436242	10.1391	3.6	0.186172	0.391345	0.422483	0.096038	0.156115	0.222786	0.25909	0.422483
LGC-4-108	640	9729.8		945737	0	616670	44192.5	23604.7	8017.3	26039	5008.1	4265.2	30935.9	23915.3	6517.1	27351.3	23539.5	13145.9		0.525719	0	0.342797	0.0245659	0.0131215	0.00445668	0.0144746	0.00278392	0.00237095	0.0171967	0.0132941	0.00362275	0.0152041	0.0130852	0.00730759		0.652053	0.0742151	0	0.417097	9.08168	3.6	0.219717	0.38184	0.398443	0.0818651	0.294434	0.272324	0.284703	0.398443
LGC-4-113	645	9847.9		752454	0	473421	38924.2	20541	5897.2	15700	5498	4754.4	20823.8	21394.7	7242.6	18843.4	16680.7	7473.6		0.533789	0	0.335843	0.0276127	0.0145717	0.00418345	0.0111375	0.00390026	0.00337276	0.0147723	0.0151773	0.00513788	0.0133674	0.0118332	0.00530175		0.629169	0.079923	0	0.404486	8.38519	3.6	0.219172	0.417706	0.363122	0.0685389	0.132942	0.266964	0.275337	0.363122
LGC-4-118	650	9968.1		583402	0	343770	25668.8	14409.4	4712.5	24839.1	6450.5	10643.6	27949.5	24857.8	7759.2	21998.7	14761.5	7164.9		0.521646	0	0.30738	0.0229516	0.0128841	0.00421365	0.0222097	0.00576767	0.00951691	0.0249909	0.0222264	0.00693784	0.01967	0.0131989	0.00640645		0.589251	0.0713008	0	0.426917	9.62404	3.6	0.28638	0.413636	0.299984	0.113626	0.226881	0.364208	0.336817	0.299984
LGC-4-123	655	10088.9		513547	0	297676	22775.5	12624.6	4536.1	24683.3	5446.2	51889.4	22604.4	18896.5	6205.2	19267.4	14014.1	5647		0.50357	0	0.291893	0.022333	0.0123793	0.00444798	0.0242038	0.0053404	0.0508813	0.0221653	0.0185294	0.00608465	0.0188931	0.0137418	0.00553729		0.579647	0.0721544	0	0.429703	9.77792	3.6	0.486316	0.282865	0.230819	0.11473	0.288379	0.592092	0.55049	0.230819
LGC-4-133	665	10334.2		491516	0	290650	25266.3	13944.7	3965.6	20083.9	6499.4	19138.4	22675.3	24403.4	9086.6	21110.8	12933.9	7454.9		0.507382	0	0.300033	0.0260819	0.0143948	0.00409361	0.0207322	0.0067092	0.0197562	0.0234073	0.0251911	0.00937992	0.0217923	0.0133514	0.00769555		0.591335	0.0807504	0	0.414815	8.95565	3.6	0.31887	0.391705	0.289425	0.115001	0.141032	0.391442	0.371728	0.289425
LGC-4-138	670	10469.5		1.05143e+06	0	668987	64182.9	40110.7	9532.1	34051.4	15022.5	13684.9	52644.1	77010.6	17111.7	46070.2	59849.7	42787.2		0.479564	0	0.305128	0.0292741	0.0182947	0.00434763	0.015531	0.00685183	0.00624174	0.0240112	0.0351249	0.00780472	0.0210128	0.0272977	0.0195154		0.636261	0.0976826	0	0.43613	10.1329	3.6	0.17519	0.409696	0.415114	0.112114	-0.0259475	0.202999	0.24554	0.415114
LGC-4-143	675	10602.8		735564	0	443234	40397.5	23355.4	6242.4	31770.5	6654.7	44885.7	26635.4	25201.6	6711.7	22678.9	19052.9	8499.8		0.510495	0	0.307612	0.0280366	0.0162091	0.00433234	0.0220493	0.00461848	0.0311515	0.0184854	0.0174904	0.00465804	0.0157396	0.0132231	0.00589901		0.602577	0.0868903	0	0.422854	9.39966	3.6	0.433705	0.304796	0.261499	0.0992896	0.263261	0.542156	0.506331	0.261499
LGC-4-148	680	10737.2		433564	0	221989	19705.7	12641.2	3570.9	26692	7940.3	10508.4	25378.6	29118.6	11338.8	24811.1	11409.7	3293.3		0.514946	0	0.263657	0.0234045	0.015014	0.00424117	0.0317021	0.00943071	0.0124808	0.0301422	0.0345842	0.0134671	0.0294682	0.0135513	0.00391146		0.512009	0.0765051	0	0.451367	10.9744	3.6	0.299957	0.437475	0.262568	0.150617	0.1477	0.389619	0.332436	0.262568
LGC-4-153	685	10871.2		670855	0	350865	32160	20408.4	5412.8	23791.1	10290.2	36180.3	26591.3	38799.9	14989.3	23177.2	15475	7766.5		0.525435	0	0.274808	0.0251887	0.0159845	0.00423948	0.0186339	0.00805961	0.0283375	0.0208271	0.0303893	0.0117401	0.0181531	0.0121205	0.00608297		0.523012	0.0795531	0	0.445337	10.6414	3.6	0.356548	0.407897	0.235555	0.0988154	0.0112849	0.431107	0.404222	0.235555
LGC-4-158	690	11001.3		994041	0	536318	54032.3	31409.2	8123.8	36361.1	12743.4	10207.5	51560.7	57037.2	12896.9	34620.3	26267.1	10149.5		0.529938	0	0.285919	0.0288054	0.0167447	0.00433092	0.0193846	0.0067937	0.00544177	0.0274878	0.0304074	0.00687553	0.0184566	0.0140034	0.00541085		0.539533	0.0860286	0	0.422518	9.38108	3.6	0.235511	0.482421	0.282067	0.109747	0.100362	0.292553	0.275323	0.282067
LGC-4-163	695	11134		1.4627e+06	0	764515	81722	47578.6	11765.3	62481.4	23437.7	15904.2	89841.8	103095	22386.1	51509.9	38580.8	19355.1		0.523352	0	0.273542	0.0292399	0.0170235	0.00420959	0.0223557	0.00838595	0.00569048	0.0321452	0.0368873	0.00800969	0.0184301	0.0138041	0.0069252		0.522672	0.0879589	0	0.420682	9.27969	3.6	0.23869	0.504752	0.256558	0.122309	0.0805619	0.298888	0.276201	0.256558
LGC-4-168	700	11261		1064298	0	535387	50323.6	28043.6	7882.8	61173.3	17789.6	14638.7	58978.5	60148.3	17880.9	34887.1	23414.8	9340.6		0.53639	0	0.269827	0.0253623	0.0141335	0.00397281	0.0308304	0.00896569	0.00737768	0.0297243	0.0303138	0.0090117	0.0175826	0.0118007	0.00470752		0.503042	0.0749643	0	0.416538	9.05081	3.6	0.313834	0.459369	0.226797	0.12715	0.187982	0.426841	0.352553	0.226797
LGC-4-173	705	11393.7		986419	0	482353	43168.2	24547.5	6976.3	68281.4	16855.1	36561.4	53675.1	55795.5	15878	44884.4	25966.3	6674		0.528052	0	0.258214	0.0231089	0.0131408	0.00373457	0.0365525	0.0090229	0.0195721	0.0287335	0.0298686	0.00849984	0.0240276	0.0139003	0.00357274		0.488994	0.0703904	0	0.422051	9.35527	3.6	0.37495	0.386198	0.238853	0.144669	0.224966	0.508272	0.416872	0.238853
LGC-4-178	710	11529.9		988689	0	455450	41971.2	24437.3	7001.6	53797.4	13536.8	15378.2	54546	55016.2	14724.6	70565.9	30230.2	6922.5		0.539599	0	0.248572	0.0229067	0.0133372	0.00382128	0.0293611	0.00738801	0.00839299	0.0297697	0.0300263	0.00803628	0.0385129	0.0164988	0.00377811		0.460661	0.069118	0	0.428264	9.69845	3.6	0.262814	0.394915	0.34227	0.153229	0.198776	0.334349	0.297993	0.34227
LGC-4-183	715	11665		1.22641e+06	0	685630	49290.7	27782.6	9853.7	61585.4	18357.6	37782.8	69877	66014.3	15718	77884.7	41032.2	7970.1		0.512031	0	0.286252	0.020579	0.0115993	0.00411395	0.0257121	0.00766435	0.0157744	0.0291739	0.0275612	0.00656231	0.0325171	0.0171311	0.00332754		0.559053	0.0661877	0	0.432964	9.95806	3.6	0.297121	0.382637	0.320242	0.145809	0.192604	0.372221	0.339053	0.320242
LGC-4-188	720	11775.8		1.148e+06	0	608082	47649	26090.7	8085	48860.2	16370.2	62963.5	53042	67769.5	19807.1	87135.7	41257.4	9995.6		0.511335	0	0.270847	0.0212234	0.0116211	0.00360116	0.0217629	0.00729148	0.0280447	0.0236255	0.0301853	0.00882232	0.0388113	0.0183765	0.00445216		0.529687	0.0665334	0	0.41767	9.11332	3.6	0.314817	0.34533	0.339853	0.141385	0.0831826	0.374868	0.360148	0.339853
LGC-5-2	725	11881.2		59986.6	0	21849.3	2453.42	1614.48	477.977	19325.4	4149.98	5648.15	15366.2	16884.4	4065.56	13389.7	13254.2	0		0.336125	0	0.122429	0.0137473	0.00904647	0.00267826	0.108286	0.0232537	0.0316485	0.0861021	0.0946087	0.0227807	0.0750269	0.0742678	0		0.364236	0.0704433	0	0.460298	11.4677	3.6	0.316272	0.394383	0.289345	0.444917	0.217295	0.424489	0.36945	0.289345
LGC-5-7	730	11983.9		37136.6	0	13939.5	1487.86	988.636	257.656	13394	3358.57	4756	11191.1	11604.2	3748.43	12293.3	6795.28	0		0.307038	0	0.115249	0.0123014	0.00817385	0.00213025	0.110739	0.027768	0.0393216	0.092526	0.0959416	0.0309913	0.101638	0.056182	0		0.375356	0.0685754	0	0.455824	11.2206	3.6	0.320349	0.395345	0.284306	0.498255	0.215658	0.426855	0.356422	0.284306
LGC-5-12	735	12088.8		53548.5	0	19162.2	1887.6	1375.75	350.798	16712.5	3578.57	5051.21	15374.9	13627.1	4526.7	11581.2	9115.01	0		0.343497	0	0.12292	0.0121084	0.00882501	0.00225026	0.107206	0.0229555	0.032402	0.0986253	0.0874137	0.0290374	0.0742897	0.05847	0		0.357848	0.0632257	0	0.477719	12.4299	3.6	0.318502	0.421388	0.260109	0.449186	0.270663	0.42753	0.35971	0.260109
LGC-5-17	740	12196.5		50579.2	0	17924.8	1999.89	1156.33	465.111	24763.2	4295.25	7712.63	21640.6	19724.2	8030.24	12677.7	14122.1	1192.68		0.271516	0	0.0962232	0.0107357	0.00620736	0.00249679	0.132933	0.0230575	0.0414026	0.11617	0.105882	0.0431075	0.0680558	0.0758096	0.00640246		0.354392	0.0668136	0	0.447748	10.7745	3.6	0.322105	0.432688	0.245207	0.538767	0.285991	0.432092	0.372012	0.245207
LGC-5-22	745	12303.2		32047	0	14747.5	1430	827.366	446.966	18424	3356.64	3123.65	17279.7	10330.4	4462.87	9756.11	4304.04	0		0.26587	0	0.122349	0.0118637	0.00686404	0.00370815	0.15285	0.0278475	0.0259146	0.143357	0.0857038	0.0370251	0.0809392	0.0357074	0		0.460185	0.0778196	0	0.471219	12.0709	3.6	0.35058	0.451495	0.197926	0.586527	0.416404	0.505601	0.373191	0.197926
LGC-5-27	750	12409.2		14529.3	0	8407.32	826.062	743.858	136.691	8027.7	1832.68	3852.88	7732.23	4744.85	3562.79	5882.67	2070.66	0		0.23303	0	0.134841	0.0132488	0.0119304	0.00219234	0.128753	0.0293935	0.0617947	0.124014	0.0761006	0.057142	0.0943495	0.0332104	0		0.578644	0.105113	0	0.515963	14.5422	3.6	0.363685	0.425388	0.210927	0.598325	0.379491	0.492466	0.384817	0.210927
LGC-5-32	755	12513.8		15057.9	0	9650.94	1031.99	839.888	267.332	16597	2436.67	3395.98	17079.9	7921.25	4063.03	12998.1	3298.88	0		0.159109	0	0.101977	0.0109045	0.00887466	0.00282476	0.175372	0.0257471	0.0358836	0.180474	0.0836997	0.042932	0.137344	0.0348576	0		0.640922	0.124394	0	0.517583	14.6316	3.6	0.330866	0.428733	0.240401	0.75608	0.512059	0.460029	0.347791	0.240401
LGC-5-37	760	12620.7		16464.3	0	9667.42	935.057	874.069	179.028	15414.8	2610.6	4750.33	17875.2	10241	5171.35	16418.9	3856.31	0		0.157616	0	0.0925479	0.00895146	0.00836762	0.00171387	0.147569	0.0249917	0.0454758	0.171123	0.0980394	0.0495062	0.157181	0.0369171	0		0.587174	0.107745	0	0.529686	15.3001	3.6	0.298351	0.436052	0.265596	0.751194	0.413356	0.390576	0.314225	0.265596
LGC-5-42	765	12725.5		37687.9	0	19757.1	1699.65	1174.57	355.638	26479.5	3311.46	4157.76	24010.3	11021.1	5024.48	14545.7	3898.86	0		0.246127	0	0.129026	0.0110999	0.00767071	0.00232255	0.172928	0.021626	0.0271529	0.156803	0.0719752	0.0328132	0.0949927	0.0254621	0		0.524227	0.0789354	0	0.473769	12.2117	3.6	0.367215	0.433275	0.19951	0.633112	0.546879	0.541807	0.383383	0.19951
LGC-5-47	770	12814		13041.8	0	7593.84	751.452	849.929	185.682	16383.8	2764.84	4435.9	15297.8	7882.39	5634.42	13384.7	2891.64	0		0.143163	0	0.0833589	0.00824881	0.00932981	0.00203826	0.179847	0.0303502	0.0486936	0.167927	0.0865263	0.0618499	0.146926	0.031742	0		0.582268	0.120512	0	0.579505	18.0516	3.6	0.34342	0.419577	0.237003	0.775559	0.47357	0.476197	0.358515	0.237003
LGC-5-52	775	12913.1		4606.95	0	3420.35	897.106	637.487	387.706	33711.6	3017.46	6326.17	31980.9	12398.7	7385.53	24442.5	5946.49	1284.84		0.0337645	0	0.0250678	0.00657491	0.00467215	0.0028415	0.247073	0.022115	0.0463646	0.234389	0.0908707	0.0541287	0.17914	0.043582	0.00941658		0.742431	0.294413	0	0.533316		3.6	0.340373	0.40923	0.250397	0.951374	0.629538	0.479642	0.361011	0.250397
LGC-5-57	780	13014.9		9961.47	0	5638.59	829.004	527.06	218.815	8894.91	2059.59	4444.38	9497.84	4395.71	3183.88	9001.42	2058.42	0		0.16408	0	0.0928758	0.0136549	0.00868144	0.0036042	0.146512	0.0339245	0.0732054	0.156443	0.0724038	0.0524432	0.148267	0.0339051	0		0.56604	0.136514	0	0.473608	12.2028	3.6	0.353703	0.392259	0.254038	0.733334	0.45473	0.472624	0.371256	0.254038
LGC-5-62	785	13116.8		19305.9	0	7753.68	1007.93	615.39	202.304	9681.64	1666.45	2659.85	5392.73	4220.35	1828.47	4432.35	1831.44	0		0.318587	0	0.127952	0.0166329	0.0101552	0.00333844	0.159767	0.0274998	0.0438931	0.0889912	0.0696445	0.0301735	0.0731429	0.0302226	0		0.401623	0.0863933	0	0.447899	10.7829	3.6	0.441706	0.360781	0.197513	0.502587	0.40836	0.687838	0.468778	0.197513
LGC-5-72	795	13316.1		16069.1	0	7476.06	1063.72	546.501	248.209	10207.2	1258.61	1920.97	9524.28	3748.78	2237.24	6094.78	2011.09	0		0.25749	0	0.119796	0.0170449	0.0087571	0.0039773	0.16356	0.020168	0.0307816	0.152617	0.0600703	0.0358494	0.0976625	0.0322257	0		0.465245	0.103663	0	0.427625	9.66318	3.6	0.361777	0.419163	0.21906	0.616448	0.595549	0.52421	0.382569	0.21906
LGC-5-77	800	13415.8		16071.5	0	7089	851.594	537.35	188.872	10345.6	1236.91	1862.36	9655.13	4554.14	2054.73	8148.89	2066.97	0		0.248542	0	0.10963	0.0131697	0.00831001	0.00292087	0.159993	0.0191285	0.028801	0.149315	0.0704288	0.0317759	0.126021	0.0319652	0		0.441093	0.0893984	0	0.460271	11.4662	3.6	0.336756	0.407366	0.255878	0.636566	0.53829	0.474377	0.355142	0.255878
LGC-5-82	805	13516.5		21681.5	0	9423.37	1207.23	623.774	165.721	11430	1854.01	2619.67	11925.1	5582.63	3610.96	9234.17	2930.65	0		0.26348	0	0.114516	0.0146707	0.00758029	0.0020139	0.138901	0.0225305	0.0318351	0.144918	0.0678419	0.0438816	0.112217	0.0356142	0		0.434627	0.0843275	0	0.395395	7.88305	3.6	0.32333	0.429353	0.247317	0.600494	0.497006	0.442961	0.343815	0.247317
LGC-5-87	810	13618.3		14172.6	0	7597.61	1387.85	706.359	282.689	10032.6	1538.5	2573.3	9321.16	4677.44	3149.04	6829.42	2071.73	0		0.220276	0	0.118085	0.0215704	0.0109785	0.00439365	0.15593	0.0239119	0.0399951	0.144873	0.0726985	0.0489435	0.106145	0.0321996	0		0.536076	0.143623	0	0.416109	9.02713	3.6	0.35191	0.426631	0.221459	0.648808	0.493257	0.494176	0.371034	0.221459
LGC-5-92	815	13720.5		10395.7	0	5628.81	950.786	625.561	266.748	11050.9	1580.24	2719.72	9845	4660.66	2373.77	7577.95	1708.76	0		0.175057	0	0.0947859	0.0160107	0.0105341	0.00449188	0.18609	0.0266104	0.0457984	0.165784	0.0784827	0.0399729	0.127608	0.0287746	0		0.541458	0.150595	0	0.484136	12.7843	3.6	0.369748	0.406567	0.223685	0.73255	0.524813	0.53143	0.385619	0.223685
LGC-5-97	820	13821		14284.5	0	6936.74	1467.31	768.128	294.551	9694.43	2315.27	3844.62	9029.26	8018.09	3690.59	13670.6	3038.2	1285.28		0.182346	0	0.0885492	0.0187306	0.00980535	0.00376001	0.123752	0.0295551	0.0490775	0.115261	0.102353	0.0471113	0.174509	0.0387834	0.016407		0.485611	0.150464	0	0.420033	9.24382	3.6	0.290445	0.379911	0.329645	0.693983	0.25815	0.372371	0.315428	0.329645
LGC-5-102	825	13903.8		13287.5	0	6524.04	1412.47	541.922	393.718	11264.1	2589.09	3483.95	10980.2	9725.56	4074.33	14036.6	3495.24	1007.37		0.160446	0	0.0787775	0.0170555	0.00654369	0.00475413	0.136014	0.0312631	0.0420686	0.132585	0.117436	0.0491974	0.169491	0.0422048	0.0121639		0.490992	0.150177	0	0.398465	8.05263	3.6	0.285826	0.408532	0.305642	0.731936	0.256797	0.370427	0.308744	0.305642
LGC-5-107	830	13983.1		11649.7	0	6046.69	1944.17	897.787	406.494	14438.2	3698.76	4185.05	16674.5	14876.5	6301.96	29826.2	6476.95	3111.41		0.0966507	0	0.0501657	0.0161296	0.00744839	0.00337243	0.119785	0.0306863	0.0347208	0.138338	0.123422	0.0522836	0.24745	0.0537354	0.0258135		0.519042	0.218043	0	0.401509	8.22075	3.6	0.22414	0.38009	0.39577	0.83951	0.224001	0.274049	0.248019	0.39577
LGC-5-112	835	14063.1		12489	0	5420.07	2438.66	857.027	226.347	11274.6	3486.27	3765.28	16880.4	17822.8	6104.48	31497.2	7925.7	3873.02		0.100668	0	0.0436889	0.0196569	0.00690813	0.00182448	0.0908794	0.0281013	0.0303503	0.136065	0.143662	0.0492056	0.253885	0.0638856	0.0312188		0.433988	0.219975	0	0.307599	3.03403	3.6	0.180514	0.39762	0.421866	0.826881	0.12099	0.210838	0.203963	0.421866
LGC-5-117	840	14142.2		24720.6	0	8660.94	5029.74	2060.04	516.251	16994	5823.06	5657.75	25953.9	32959.9	12186.9	45786.1	16846.9	9934.91		0.115988	0	0.0406367	0.0235993	0.00966563	0.00242222	0.0797352	0.0273215	0.0265459	0.121774	0.154646	0.0571804	0.214826	0.0790448	0.0466141		0.350353	0.235287	0	0.338717	4.75269	3.6	0.165414	0.413032	0.421555	0.78211	0.0443015	0.190689	0.19589	0.421555
LGC-5-122	845	14221.7		52292.3	0	16819.7	12613.6	6192.85	1075.98	22944.7	12183.7	17493.2	36871.5	80366.2	36927.5	80185.6	39501.2	33785.6		0.116398	0	0.0374392	0.0280769	0.0137847	0.00239504	0.0510729	0.0271199	0.0389383	0.0820728	0.178888	0.0821975	0.178486	0.0879263	0.0752038		0.321648	0.275477	0	0.36559		3.6	0.146066	0.427929	0.426005	0.728061	-0.189557	0.161847	0.183368	0.426005
LGC-5-127	850	14301.2		33405.3	0	11473.1	5626.99	2614.3	557.193	17737.7	5767.95	5154.62	27496.3	34536.9	11357.5	58944.9	21375.1	14525.5		0.133315	0	0.0457873	0.0224565	0.0104333	0.00222367	0.0707884	0.023019	0.0205713	0.109734	0.137832	0.0453261	0.23524	0.0853047	0.0579691		0.343451	0.208476	0	0.360459	5.95349	3.6	0.14556	0.372738	0.481702	0.757201	0.0501076	0.165293	0.178019	0.481702
LGC-5-132	855	14378.1		36288.6	0	12729.1	6042.41	3106.13	575.019	26502.6	8188.11	8704.06	37277.2	41835.9	16182.4	75624.8	22213.6	10490.8		0.118683	0	0.0416308	0.0197619	0.0101587	0.00188062	0.0866777	0.0267795	0.0284669	0.121916	0.136826	0.0529249	0.247333	0.0726504	0.0343105		0.350774	0.211326	0	0.37858	6.95436	3.6	0.175674	0.385781	0.438545	0.793455	0.105504	0.204375	0.202481	0.438545
LGC-5-137	860	14456.2		33467.8	0	12267.6	5787.19	2715.98	516.434	21848.2	6897.56	8575.04	31353.9	43220	14765.4	66847.1	27379.2	16877		0.114413	0	0.041938	0.019784	0.00928483	0.00176548	0.07469	0.0235799	0.0293146	0.107186	0.147751	0.0504768	0.228523	0.0935984	0.0576954		0.366551	0.212289	0	0.358377	5.83851	3.6	0.156966	0.375749	0.467285	0.781993	0.0259384	0.178553	0.192865	0.467285
LGC-5-142	865	14534.9		43121.2	0	14526	7568.41	3568.24	847.255	25677.3	10304.1	8388.78	39745.2	67502.1	25296.6	83937.5	41327.9	29081.2		0.107563	0	0.0362343	0.0188789	0.00890076	0.00211343	0.0640505	0.0257028	0.0209253	0.0991419	0.16838	0.0631009	0.209377	0.10309	0.0725413		0.336865	0.217474	0	0.368452	6.39499	3.6	0.133943	0.40012	0.465937	0.775972	-0.0752865	0.150265	0.170097	0.465937
LGC-5-147	870	14612.1		52522.7	0	15807.5	9385.5	4927.41	823.535	26056.8	13635.3	11633.1	42940	90298.4	36734.3	107679	56266.6	47716.9		0.101704	0	0.0306093	0.0181739	0.00954135	0.00159468	0.0504558	0.0264032	0.0225261	0.0831483	0.174852	0.0711317	0.208508	0.108954	0.0923981		0.300964	0.223716	0	0.37994	7.02949	3.6	0.118545	0.392582	0.488873	0.770842	-0.177927	0.130509	0.156014	0.488873
LGC-5-152	875	14692.6		61720.5	0	19170.4	11188.4	4731.56	969.657	45925	18197.5	15474.9	104965	94359.9	24718	167515	49675.4	25199.9		0.0958674	0	0.0297763	0.0173784	0.0073493	0.00150612	0.0713329	0.0282653	0.0240365	0.163037	0.146564	0.0383932	0.260193	0.0771582	0.0391418		0.310599	0.214853	0	0.337557	4.68863	3.6	0.145775	0.410312	0.443914	0.837631	0.127286	0.165171	0.168941	0.443914
LGC-5-157	880	14780.6		34203.2	0	12589.4	5127.41	2223.18	583.599	32195.7	12198	12882.5	69768.6	57974.9	17188.1	116489	27804.1	10944.5		0.0829827	0	0.0305439	0.01244	0.0053938	0.00141591	0.0781121	0.0295943	0.0312551	0.16927	0.140657	0.0417012	0.282623	0.0674575	0.0265532		0.368076	0.188293	0	0.353757	5.58337	3.6	0.160237	0.405465	0.434298	0.864626	0.162279	0.18296	0.179719	0.434298
LGC-5-162	885	14873.2		41793.1	0	14465.7	5689.1	2790.38	497.573	33610.5	12391.6	20155.8	44456.1	58093.5	18633.5	89224.3	35164.9	13357.8		0.107073	0	0.0370608	0.0145753	0.00714889	0.00127477	0.0861093	0.031747	0.0516388	0.113895	0.148834	0.0477385	0.22859	0.0900916	0.0342223		0.346127	0.176818	0	0.366262	6.27404	3.6	0.203508	0.37277	0.423722	0.800113	0.0443677	0.237052	0.239213	0.423722
LGC-6-3	890	14963.2		21758.7	0	10965.7	1691.55	903.365	251.292	20864.2	5074.64	11258.1	18900.7	20155.8	11730.3	21310.2	11082.9	2340.45		0.137462	0	0.0692768	0.0106866	0.0057071	0.00158756	0.131811	0.0320596	0.0711241	0.119407	0.127336	0.0741076	0.13463	0.0700175	0.014786		0.503969	0.115677	0	0.405682	8.45123	3.6	0.30311	0.413852	0.283037	0.737322	0.197575	0.38435	0.340338	0.283037
LGC-6-8	895	15052.1		22921.5	0	11689.6	1550.12	747.123	289.103	16196.7	3272.03	6016.64	20060.9	20165.2	8179.54	29139.8	14105.8	2781.32		0.145889	0	0.0744012	0.0098661	0.00475525	0.00184007	0.103088	0.0208256	0.0382944	0.127683	0.128347	0.0520607	0.185468	0.0897798	0.0177024		0.509984	0.101394	0	0.400653	8.17348	3.6	0.212524	0.403656	0.38382	0.740469	0.189493	0.253714	0.247357	0.38382
LGC-6-13	900	15142.6		20692.3	0	10039.1	1134.87	787.341	298.419	13385.5	2282.39	42447.9	17254.8	12601	5270.59	26026.5	9855.62	1572.03		0.126444	0	0.0613457	0.00693483	0.00481118	0.00182354	0.0817941	0.0139469	0.259385	0.105438	0.0770002	0.0322068	0.159039	0.0602244	0.00960617		0.485162	0.0969162	0	0.488941	13.0497	3.6	0.444663	0.268763	0.286574	0.732516	0.313591	0.505229	0.487268	0.286574
LGC-6-18	905	15232.4		21053.2	0	9896.25	1539.76	880.055	148.182	19506.1	4694.94	7001.43	23143.9	32711.8	9825.85	35046.1	23677.5	7507.71		0.107069	0	0.0503286	0.00783062	0.00447562	0.000753595	0.0992006	0.0238767	0.0356066	0.117701	0.16636	0.0499705	0.178231	0.120415	0.0381813		0.470059	0.108716	0	0.400404	8.15974	3.6	0.191291	0.40267	0.40604	0.786802	0.0569691	0.224617	0.236507	0.40604
LGC-6-22	909	15306.3		37620.2	0	13603.1	3110.83	1561.59	354.949	32250	11588.6	23391	42604.6	64921.2	20892.8	63337.7	40725.6	12216.8		0.102179	0	0.036947	0.00844923	0.00424139	0.000964067	0.0875932	0.0314755	0.0635316	0.115717	0.176331	0.0567464	0.17203	0.110613	0.0331818		0.361591	0.117882	0	0.381221	7.10023	3.6	0.215529	0.411693	0.372778	0.786021	-0.00949902	0.250773	0.259588	0.372778
LGC-6-28	915	15415.3		43839.5	0	16238.3	2873.77	1745.84	393.764	22571.2	8130.14	11052.4	29318.7	37020.8	14287.9	39355.9	20977.2	5128.82		0.173324	0	0.0641997	0.0113617	0.00690234	0.00155678	0.0892373	0.0321433	0.0436966	0.115914	0.146365	0.0564886	0.155598	0.0829353	0.0202773		0.370404	0.102622	0	0.426779	9.61641	3.6	0.22228	0.429228	0.348493	0.675468	0.0604157	0.265707	0.258158	0.348493
LGC-6-33	920	15517.9		43964.2	0	19384.2	2380.58	1804.71	492.452	23469.2	10944.3	32370.5	28136.7	32161.6	13718.5	34217.5	9662.33	2105.1		0.172536	0	0.0760724	0.00934248	0.0070825	0.00193261	0.0921039	0.0429505	0.127037	0.110421	0.126217	0.0538379	0.134285	0.0379195	0.0082614		0.440907	0.0961666	0	0.491083	13.168	3.6	0.357543	0.396266	0.246191	0.66126	0.0781623	0.438295	0.381583	0.246191
LGC-6-38	925	15633.6		7207.52	0	6148.77	655.479	378.895	443.301	15856.6	2507.6	12390.9	12734	8103.62	5037.76	11729.5	3982.28	496.399		0.0822094	0	0.0701332	0.00747643	0.0043217	0.00505632	0.180861	0.0286018	0.141332	0.145245	0.0924303	0.057461	0.133788	0.0454221	0.00566196		0.853105	0.170137	0	0.556412	16.7762	3.6	0.422236	0.355242	0.222522	0.848351	0.430459	0.564578	0.449899	0.222522
LGC-6-43	930	15754.6		11279.2	0	7724.58	705.075	835.602	301.041	8902.65	1054.43	60886.5	9103.26	4188.65	1760.41	8944.49	2480	447.815		0.0950921	0	0.0651239	0.0059443	0.00704474	0.002538	0.0750558	0.00888961	0.513317	0.0767471	0.0353134	0.0148415	0.0754086	0.0209082	0.00377541		0.68485	0.140365	0	0.617165	20.1316	3.6	0.724607	0.153959	0.121433	0.704961	0.535828	0.806772	0.746977	0.121433
LGC-6-48	935	15873.4		7600.19	0	5864.27	574.239	754.89	198.665	7339.02	1019.31	1154.49	7408.74	4126.41	1674.42	6892.28	1698.5	292.13		0.163103	0	0.125849	0.0123234	0.0162002	0.00426342	0.157498	0.0218747	0.0247757	0.158994	0.0885541	0.0359337	0.147911	0.0364505	0.00626922		0.771596	0.167375	0	0.624139	20.5168	3.6	0.300988	0.417954	0.281058	0.740078	0.457281	0.409207	0.32122	0.281058
LGC-6-53	940	15986.4		5278.84	0	4413.06	395.251	615.917	190.651	5137.28	1082.51	1253.4	6288.61	2737.55	1211.95	5983.39	1081.62	0		0.147991	0	0.123719	0.0110808	0.0172671	0.00534485	0.144022	0.0303479	0.0351388	0.1763	0.0767464	0.0339768	0.167743	0.030323	0		0.835991	0.185447	0	0.671123	23.1118	3.6	0.301626	0.413222	0.285152	0.76733	0.47582	0.402726	0.315395	0.285152
LGC-6-58	945	16108		3424.55	0	5112.84	346.342	240.908	306.208	7543.01	1278.17	26390.6	8423.59	4011.42	1044.76	9057.76	1785.43	353.557		0.0494027	0	0.0737579	0.00499634	0.00347534	0.00441737	0.108816	0.018439	0.380711	0.121519	0.0578689	0.0150718	0.130668	0.0257567	0.00510043		1.49299	0.206914	0	0.612358	19.8661	3.6	0.587958	0.225082	0.186961	0.879625	0.47979	0.68952	0.609735	0.186961
[truncated: 2 more columns]

## Sheet: 2nd
ID	Depth	age	Ic 1018	Ib 1020	Ia 1022	Iic 1032	Iic' 1032	Iib 1034	Iib' 1034	Iia 1036	Iia' 1036	IIIa 1050	IIIa' 1050		Ic 1018	Ib 1020	Ia 1022	Iic 1032	Iic' 1032	Iib 1034	Iib' 1034	Iia 1036	Iia' 1036	IIIa 1050	IIIa' 1050		MBT'5ME	MBT'6ME	MAT Russell 2018OG	Error
LGC- 3-173	512	7521.5	4276	0	6232.13	7049.57	0	9881.3	10349.9	13954.3	4968.32	6918.36	10982.7		0.0573094	0	0.0835265	0.0944823	0	0.132435	0.138715	0.187023	0.0665882	0.0927238	0.147196		0.217507	0.285477	5.84158	2.44
LGC-4-23	555	8146.5	3699.2	0	19930	2321	0	6638.56	18534.6	4760.5	15299.7	6488.8	18529.9		0.0384523	0	0.207168	0.0241263	0	0.0690063	0.192663	0.0494843	0.159037	0.0674496	0.192614		0.539011	0.310938	16.2647	2.44
LGC-4-53	585	8634.6	3083	0	16580.4	2103	777.85	2554.4	5110.7	2199.24	8478.36	3254.3	8554.6		0.0585056	0	0.314643	0.0399083	0.0147611	0.0484744	0.0969849	0.0417346	0.160892	0.0617563	0.162339		0.660414	0.461746	20.2006	2.44
LGC-4-73	605	8980.1	4379.2	0	23077.4	5050.6	739.6	6513.7	9925.2	15328.9	9231	5371.97	12951.2		0.0473075	0	0.2493	0.0545605	0.00798974	0.0703661	0.10722	0.165595	0.0997205	0.0580322	0.139909		0.459742	0.455306	13.6948	2.44
LGC-4-88	620	9263.2	2409	0	19550.7	1906	0	4589.68	7798.4	3760	11162.4	6084.2	10961		0.0353115	0	0.286577	0.0279385	0	0.0672763	0.11431	0.0551147	0.16362	0.0891832	0.160668		0.573367	0.423266	17.3785	2.44
LGC-4-118	650	9968.1	5668.4	0	21483.6	7283.5	0	8291.8	12056	4071	15717.1	6724.15	11993.5		0.0607617	0	0.230291	0.0780745	0	0.0888829	0.129233	0.0436386	0.168477	0.0720787	0.128563		0.507301	0.405747	15.2367	2.44
LGC-4-183	715	11665	7346.9	0	46507.7	10913.8	0	14748.7	33624.9	51043.4	7965.8	20427.1	36974.3		0.0320053	0	0.202601	0.0475438	0	0.0642498	0.14648	0.22236	0.0347014	0.0889866	0.161071		0.356682	0.406697	10.3536	2.44
LGC-5-42	765	12725.5	3584.47	0	14928.7	4303	0	3391.7	4466.4	0	0	2903.8	5404.4		0.0919508	0	0.382959	0.110383	0	0.0870058	0.114575	0	0	0.0744899	0.138637		0.635936	0.65224	19.4071	2.44
LGC-5-107	830	13983.1	3617.7	0	9731.21	4204.7	1970.8	4206.1	12159.2	8517.7	3328.2	4491.6	18258.2		0.0513255	0	0.13806	0.0596535	0.0279604	0.0596733	0.172507	0.120843	0.0472183	0.0637238	0.259035		0.383931	0.272064	11.2371	2.44
LGC-5-122	845	14221.7	10271.3	0	14950.2	14881.7	17133.1	52245.7	6389.7	21976.2	17526.1	12521.2	45980.9		0.0480245	0	0.0699012	0.0695809	0.0801076	0.24428	0.0298757	0.102752	0.0819451	0.0585442	0.214988		0.198835	0.224688	5.23623	2.44
LGC-5-137	860	14456.2	5662.3	0	13418.5	5433.9	6533	26489	3451.6	128377	10030.6	11885.2	39090.2		0.0226156	0	0.0535944	0.0217034	0.0260932	0.105799	0.0137859	0.512746	0.0400629	0.0474703	0.156129		0.0997606	0.244043	2.02424	2.44
LGC-5-152	875	14692.6	11742.3	12530.8	28893.1	10810.8	8291.4	17186.5	51109.7	64097.3	17823	68180	59821.2		0.0335029	0.0357526	0.0824372	0.0308452	0.0236569	0.0490362	0.145825	0.182881	0.0508522	0.19453	0.170681		0.249091	0.279511	6.86553	2.44
LGC-6-3	890	14963.2	5395.8	0	11603.1	7488.51	956.1	4155	12695.5	8971	4657.5	2171	10135.8		0.0790833	0	0.17006	0.109755	0.014013	0.0608976	0.186071	0.131483	0.0682625	0.0318192	0.148555		0.427275	0.374064	12.6423	2.44
LGC-6-18	905	15232.4	3751.9	0	13251.2	5294.84	0	3943.4	16803.9	10107.3	6566.54	2732	20930.2		0.0449969	0	0.158923	0.0635015	0	0.0472936	0.201531	0.121218	0.0787532	0.0327651	0.251018		0.435077	0.277358	12.8952	2.44
LGC-6-33	920	15517.9	12758.1	0	14933.1	9574.27	0	23904.2	0	16464	5448.71	1553	17821.3		0.124522	0	0.14575	0.0934471	0	0.23331	0	0.160692	0.0531806	0.0151576	0.17394		0.349695	0.543378	10.1271	2.44
